# Supplementary material for: Unmasking coupling between channel gating and ion permeation in the muscle nicotinic receptor
Source: eLife. 2021 Apr 6;10:e66225. doi: 10.7554/eLife.66225 (PMC8024024; doi:10.7554/eLife.66225)
Supplement: Figure 3—source data 1. [file elife-66225-fig3-data1.xlsx]

## Sheet: Sheet1
Figure 3b, Open Probabilty
Delta DN
3 µm	0.014	0.021	0.019	0.012	0.01	0.019	0.01	0.029	0.021	0.022	0.03	0.021	0.009	0.012	0.014	0.017	0.025	0.03	0.018	0.014	0.012	0.01	0.013	0.015	0.01	0.018	0.022	0.004	0.007	0.012	0.017	0.014	0.01	0.022	0.021	0.009	0.012	0.013	0.016	0.019	0.009	0.01	0.014	0.026	0.018	0.014	0.02	0.015	0.024
10 µm	0.12	0.078	0.034	0.064	0.076	0.068	0.062	0.092	0.082	0.095	0.121	0.108	0.094	0.094	0.074	0.097	0.077	0.062	0.074	0.146	0.111	0.093	0.119	0.13	0.127	0.124	0.092	0.066	0.094	0.107	0.066	0.094	0.123	0.1	0.09	0.096	0.107	0.114	0.078	0.127	0.101	0.062	0.073	0.087	0.091	0.057	0.135	0.088	0.048
30 µm	0.634	0.48	0.178	0.226	0.349	0.252	0.391	0.382	0.489	0.679	0.524	0.189	0.528	0.195	0.405	0.588	0.623	0.558	0.362	0.424	0.543	0.609	0.481	0.494	0.374	0.452	0.619	0.499	0.414	0.299	0.366	0.357	0.475	0.416	0.504	0.539	0.431	0.511	0.431	0.402	0.453	0.26	0.552	0.393	0.529	0.349	0.432	0.297	0.444
100 µm	0.647	0.783	0.241	0.692	0.788	0.276	0.598	0.73	0.716	0.763	0.55	0.609	0.663	0.825	0.231	0.406	0.632	0.515	0.656	0.75	0.367	0.4	0.488	0.43	0.812	0.667	0.693	0.621	0.578	0.76	0.477	0.546	0.771	0.743	0.407	0.657	0.391	0.664	0.608	0.746	0.724	0.659	0.851	0.541	0.837	0.675	0.803	0.686	0.725
300 µm	0.589	0.779	0.719	0.752	0.683	0.422	0.697	0.653	0.767	0.698	0.382	0.677	0.656	0.642	0.849	0.489	0.635	0.596	0.654	0.402	0.367	0.833	0.672	0.683	0.763	0.821	0.77	0.689	0.761	0.779	0.76	0.691	0.817	0.725	0.54	0.717	0.738	0.712	0.746	0.824	0.772	0.742	0.65	0.387	0.538	0.385	0.431	0.559	0.707
Beta DN
3 µm	0.005	0.008	0.006	0.005	0.006	0.009	0.008	0.012	0.008	0.004	0.005	0.003	0.003	0.004	0.003	0.003	0.006	0.004	0.005	0.005	0.005	0.005	0.009	0.005	0.01	0.003	0.004	0.004	0.003	0.003	0.003	0.002	0.004	0.006	0.006	0.003	0.003	0.004	0.006	0.002	0.002	0.003	0.006	0.006	0.002	0.004	0.003	0.003	0.002
10 µm	0.014	0.013	0.008	0.031	0.043	0.048	0.028	0.016	0.008	0.014	0.015	0.027	0.013	0.011	0.009	0.024	0.019	0.024	0.015	0.02	0.018	0.011	0.033	0.014	0.021	0.02	0.007	0.012	0.013	0.018	0.069	0.013	0.013	0.016	0.028	0.021	0.022	0.01	0.041	0.022	0.02	0.028	0.021	0.027	0.056	0.032	0.023	0.049	0.067
30 µm	0.05	0.036	0.144	0.036	0.06	0.104	0.065	0.091	0.047	0.061	0.059	0.092	0.051	0.042	0.064	0.097	0.069	0.146	0.048	0.075	0.096	0.024	0.081	0.153	0.057	0.064	0.046	0.039	0.041	0.058	0.082	0.039	0.07	0.038	0.045	0.079	0.076	0.077	0.045	0.053	0.038	0.149	0.112	0.024	0.075	0.026	0.053	0.03	0.101
100 µm	0.068	0.071	0.231	0.236	0.204	0.165	0.241	0.201	0.117	0.082	0.205	0.177	0.193	0.086	0.117	0.097	0.087	0.134	0.073	0.044	0.086	0.07	0.1	0.244	0.018	0.039	0.029	0.097	0.111	0.174	0.187	0.132	0.17	0.191	0.087	0.122	0.162	0.075	0.044	0.193	0.275	0.165	0.124	0.139	0.038	0.066	0.044	0.083	0.047
300 µm	0.034	0.091	0.112	0.132	0.115	0.201	0.186	0.181	0.176	0.129	0.188	0.063	0.125	0.089	0.152	0.04	0.095	0.103	0.104	0.07	0.058	0.07	0.144	0.149	0.081	0.101	0.139	0.061	0.118	0.042	0.039	0.181	0.12	0.066	0.142	0.239	0.152	0.081	0.057	0.122	0.143	0.165	0.117	0.126	0.111	0.12	0.06	0.167	0.069
Beta + Delta DN
10 µm	0.001	0.001	0.003	0.002	0.003	0.004	0.002	0.003	0.004	0.002	0.002	0.003	0.002	0.002	0.002	0.002	0.002	0.002	0.003	0.002	0.002	0.001	0.002	0.004	0.002	0.002	0.001	0.002	0.003	0.002	0.002	0.005	0.002	0.003	0.003	0.004	0.004	0.003	0.002	0.002	0.003	0.004	0.003	0.002	0.002	0.004	0.002	0.003	0.004
30 µm	0.005	0.008	0.006	0.003	0.003	0.003	0.007	0.003	0.007	0.007	0.004	0.006
100 µm	0.013	0.018	0.018	0.02	0.014	0.009	0.017	0.032	0.02	0.038	0.024	0.026	0.012	0.041	0.02	0.036	0.018	0.035	0.022	0.034	0.024	0.01	0.021	0.026	0.01	0.02	0.028	0.014	0.019	0.018	0.035	0.015	0.028	0.01	0.052	0.025	0.018	0.015	0.044	0.024	0.033	0.037	0.028	0.011	0.028	0.017	0.024	0.037	0.044
300 µm	0.007	0.016	0.011	0.013	0.008	0.005	0.012	0.008	0.009	0.013	0.013	0.008	0.014	0.009	0.031	0.007	0.013	0.022	0.013	0.021	0.009	0.007	0.008	0.016	0.031	0.011	0.026	0.007	0.021	0.015	0.014	0.025	0.01	0.012	0.005	0.01	0.021	0.013	0.022	0.007
[truncated: 165 more columns]
