# Supplementary material for: Unmasking coupling between channel gating and ion permeation in the muscle nicotinic receptor
Source: eLife. 2021 Apr 6;10:e66225. doi: 10.7554/eLife.66225 (PMC8024024; doi:10.7554/eLife.66225)
Supplement: Figure 4—source data 1. [file elife-66225-fig4-data1.xlsx]

## Sheet: Sheet1
Beta DN
3 µm	0.005	0.008	0.006	0.005	0.006	0.009	0.008	0.012	0.008	0.004	0.005	0.003	0.003	0.004	0.003	0.003	0.006	0.004	0.005	0.005	0.005	0.005	0.009	0.005	0.01	0.003	0.004	0.004	0.003	0.003	0.003	0.002	0.004	0.006	0.006	0.003	0.003	0.004	0.006	0.002	0.002	0.003	0.006	0.006	0.002	0.004	0.003	0.003	0.002
10 µm	0.014	0.013	0.008	0.031	0.043	0.048	0.028	0.016	0.008	0.014	0.015	0.027	0.013	0.011	0.009	0.024	0.019	0.024	0.015	0.02	0.018	0.011	0.033	0.014	0.021	0.02	0.007	0.012	0.013	0.018	0.069	0.013	0.013	0.016	0.028	0.021	0.022	0.01	0.041	0.022	0.02	0.028	0.021	0.027	0.056	0.032	0.023	0.049	0.067
30 µm	0.05	0.036	0.144	0.036	0.06	0.104	0.065	0.091	0.047	0.061	0.059	0.092	0.051	0.042	0.064	0.097	0.069	0.146	0.048	0.075	0.096	0.024	0.081	0.153	0.057	0.064	0.046	0.039	0.041	0.058	0.082	0.039	0.07	0.038	0.045	0.079	0.076	0.077	0.045	0.053	0.038	0.149	0.112	0.024	0.075	0.026	0.053	0.03	0.101
100 µm	0.068	0.071	0.231	0.236	0.204	0.165	0.241	0.201	0.117	0.082	0.205	0.177	0.193	0.086	0.117	0.097	0.087	0.134	0.073	0.044	0.086	0.07	0.1	0.244	0.018	0.039	0.029	0.097	0.111	0.174	0.187	0.132	0.17	0.191	0.087	0.122	0.162	0.075	0.044	0.193	0.275	0.165	0.124	0.139	0.038	0.066	0.044	0.083	0.047
300 µm	0.034	0.091	0.112	0.132	0.115	0.201	0.186	0.181	0.176	0.129	0.188	0.063	0.125	0.089	0.152	0.04	0.095	0.103	0.104	0.07	0.058	0.07	0.144	0.149	0.081	0.101	0.139	0.061	0.118	0.042	0.039	0.181	0.12	0.066	0.142	0.239	0.152	0.081	0.057	0.122	0.143	0.165	0.117	0.126	0.111	0.12	0.06	0.167	0.069
Beta DKKD
3 µm	0.069	0.034	0.041	0.02	0.039	0.052	0.059	0.03	0.096	0.035	0.085	0.057	0.047	0.061	0.036	0.025	0.031	0.037	0.031	0.015	0.071	0.026	0.075	0.054	0.047	0.022	0.02	0.011	0.047	0.045	0.014	0.059	0.026	0.011	0.055	0.044	0.03	0.04	0.035	0.028	0.043	0.035	0.04	0.028	0.05	0.035	0.027	0.012	0.027
10 µm	0.299	0.439	0.269	0.384	0.251	0.305	0.434	0.218	0.359	0.255	0.297	0.281	0.373	0.232	0.302	0.372	0.338	0.26	0.279	0.298	0.419	0.144	0.082	0.137	0.064	0.221	0.309	0.444	0.329	0.285	0.375	0.292	0.231	0.321	0.266	0.215	0.196	0.241	0.366	0.241	0.294	0.249	0.2	0.262	0.262	0.281	0.264	0.207	0.266
30 µm	0.325	0.528	0.524	0.554	0.691	0.407	0.794	0.526	0.667	0.772	0.736	0.67	0.609	0.661	0.529	0.543	0.717	0.599	0.697	0.262	0.73	0.578	0.547	0.632	0.599	0.553	0.347	0.376	0.291	0.636	0.292	0.463	0.463	0.353	0.629	0.435	0.488	0.607	0.308	0.438	0.489	0.672	0.474	0.513	0.463	0.429	0.66	0.525	0.256
100 µm	0.748	0.866	0.807	0.637	0.452	0.868	0.577	0.576	0.508	0.566	0.679	0.786	0.712	0.763	0.724	0.844	0.723	0.841	0.772	0.748	0.623	0.809	0.706	0.717	0.719	0.771	0.807	0.702	0.842	0.812	0.52	0.736	0.722	0.47	0.731	0.8	0.855	0.792	0.754	0.413	0.521	0.47	0.727	0.559	0.503	0.648	0.477	0.878	0.876
300 µm	0.736	0.678	0.581	0.567	0.777	0.868	0.612	0.867	0.68	0.72	0.779	0.819	0.703	0.748	0.898	0.684	0.511	0.595	0.753	0.729	0.824	0.705	0.637	0.664	0.763	0.737	0.559	0.739	0.618	0.686	0.656	0.7	0.722	0.726	0.694	0.649	0.714	0.661	0.532	0.695	0.86	0.825	0.729	0.808	0.869	0.855	0.813	0.892	0.576
[truncated: 157 more columns]
