# Supplementary material for: Unmasking coupling between channel gating and ion permeation in the muscle nicotinic receptor
Source: eLife. 2021 Apr 6;10:e66225. doi: 10.7554/eLife.66225 (PMC8024024; doi:10.7554/eLife.66225)
Supplement: Figure 4—source data 2. [file elife-66225-fig4-data2.xlsx]

## Sheet: Sheet1
Delta DN
3 µm	0.014	0.021	0.019	0.012	0.01	0.019	0.01	0.029	0.021	0.022	0.03	0.021	0.009	0.012	0.014	0.017	0.025	0.03	0.018	0.014	0.012	0.01	0.013	0.015	0.01	0.018	0.022	0.004	0.007	0.012	0.017	0.014	0.01	0.022	0.021	0.009	0.012	0.013	0.016	0.019	0.009	0.01	0.014	0.026	0.018	0.014	0.02	0.015	0.024
10 µm	0.12	0.078	0.034	0.064	0.076	0.068	0.062	0.092	0.082	0.095	0.121	0.108	0.094	0.094	0.074	0.097	0.077	0.062	0.074	0.146	0.111	0.093	0.119	0.13	0.127	0.124	0.092	0.066	0.094	0.107	0.066	0.094	0.123	0.1	0.09	0.096	0.107	0.114	0.078	0.127	0.101	0.062	0.073	0.087	0.091	0.057	0.135	0.088	0.048
30 µm	0.634	0.48	0.178	0.226	0.349	0.252	0.391	0.382	0.489	0.679	0.524	0.189	0.528	0.195	0.405	0.588	0.623	0.558	0.362	0.424	0.543	0.609	0.481	0.494	0.374	0.452	0.619	0.499	0.414	0.299	0.366	0.357	0.475	0.416	0.504	0.539	0.431	0.511	0.431	0.402	0.453	0.26	0.552	0.393	0.529	0.349	0.432	0.297	0.444
100 µm	0.647	0.783	0.241	0.692	0.788	0.276	0.598	0.73	0.716	0.763	0.55	0.609	0.663	0.825	0.231	0.406	0.632	0.515	0.656	0.75	0.367	0.4	0.488	0.43	0.812	0.667	0.693	0.621	0.578	0.76	0.477	0.546	0.771	0.743	0.407	0.657	0.391	0.664	0.608	0.746	0.724	0.659	0.851	0.541	0.837	0.675	0.803	0.686	0.725
300 µm	0.589	0.779	0.719	0.752	0.683	0.422	0.697	0.653	0.767	0.698	0.382	0.677	0.656	0.642	0.849	0.489	0.635	0.596	0.654	0.402	0.367	0.833	0.672	0.683	0.763	0.821	0.77	0.689	0.761	0.779	0.76	0.691	0.817	0.725	0.54	0.717	0.738	0.712	0.746	0.824	0.772	0.742	0.65	0.387	0.538	0.385	0.431	0.559	0.707
Delta DKKD
3 µm	0.113	0.094	0.107	0.156	0.139	0.108	0.122	0.11	0.126	0.139	0.117	0.087	0.145	0.136	0.114	0.113	0.1	0.111	0.114	0.111	0.121	0.124	0.18	0.149	0.147	0.154	0.18	0.115	0.158	0.114	0.103	0.105	0.189	0.111	0.18	0.167	0.122	0.159	0.126	0.135	0.321	0.22	0.307	0.245
10 µm	0.705	0.639	0.753	0.445	0.67	0.285	0.418	0.688	0.504	0.495	0.716	0.441	0.472	0.44	0.24	0.629	0.693	0.514	0.592	0.596	0.475	0.553	0.633	0.245	0.557	0.586	0.497	0.586	0.422	0.609	0.503	0.622	0.537	0.609	0.746	0.575	0.675	0.357	0.447	0.277	0.295	0.466
30 µm	0.631	0.845	0.652	0.784	0.901	0.729	0.714	0.861	0.869	0.869	0.723	0.707	0.812	0.752	0.914	0.701	0.829	0.844	0.762	0.85	0.91	0.844	0.782	0.931	0.602	0.622	0.924
100 µm	0.76	0.914	0.895	0.84	0.7	0.905	0.779	0.909	0.785	0.775	0.764	0.945	0.898	0.854	0.897	0.697	0.828	0.89	0.711	0.699	0.728	0.906	0.842	0.802	0.831	0.916	0.894	0.912	0.902	0.89	0.906	0.9	0.867	0.873	0.9	0.859	0.904	0.859	0.886	0.914	0.955	0.921	0.911	0.947	0.836	0.916	0.906	0.904	0.883
300 µm	0.893	0.926	0.903	0.925	0.792	0.944	0.928	0.91	0.91	0.958	0.85	0.795	0.934	0.89	0.817	0.837	0.941	0.906	0.864	0.887	0.881	0.875	0.854	0.925	0.887	0.931	0.839	0.952	0.934	0.92	0.862	0.837	0.905	0.896	0.853	0.916	0.825	0.916
[truncated: 165 more columns]
