# Supplementary material for: Unmasking coupling between channel gating and ion permeation in the muscle nicotinic receptor
Source: eLife. 2021 Apr 6;10:e66225. doi: 10.7554/eLife.66225 (PMC8024024; doi:10.7554/eLife.66225)
Supplement: Figure 6—source data 1. [file elife-66225-fig6-data1.xlsx]

## Sheet: Sheet1
Figure 6b, Open Channel Current Histograms (A)
WT	Beta DN	Beta DN + Delta DN
-8.24207e-13	-2.80021e-12	-1.52987e-12
-8.73037e-13	-2.01896e-12	-1.04159e-12
-9.70697e-13	-1.14006e-12	-6.02137e-13
-1.01953e-12	-4.56469e-13	-3.09167e-13
-1.06835e-12	2.75961e-13	-1.61966e-14
-1.11718e-12	8.13061e-13	2.76773e-13
-1.11718e-12	1.30135e-12	4.23253e-13
-1.16601e-12	1.69197e-12	6.18563e-13
-1.21484e-12	1.98494e-12	7.65053e-13
-1.26367e-12	2.18025e-12	9.11533e-13
-1.36132e-12	2.32674e-12	1.00919e-12
-1.41015e-12	2.47322e-12	1.10685e-12
-1.45898e-12	2.6197e-12	1.10685e-12
-1.5078e-12	2.76619e-12	1.15567e-12
-1.45898e-12	2.91267e-12	1.10685e-12
-1.41015e-12	3.10798e-12	1.10685e-12
-1.36132e-12	3.3033e-12	1.10685e-12
-1.26367e-12	3.54744e-12	1.05802e-12
-1.06835e-12	3.74275e-12	1.00919e-12
-8.73037e-13	3.93806e-12	1.00919e-12
-7.26557e-13	4.03572e-12	9.60363e-13
-5.31237e-13	4.13337e-12	9.11533e-13
-3.84757e-13	4.1822e-12	8.62713e-13
-2.38277e-13	4.1822e-12	8.13883e-13
-1.40617e-13	4.13337e-12	7.65053e-13
-9.17873e-14	4.08454e-12	6.67393e-13
-4.29573e-14	3.98689e-12	5.69743e-13
-4.29573e-14	3.8404e-12	4.23253e-13
-4.29573e-14	3.69392e-12	2.27943e-13
5.86271e-15	3.59626e-12	1.30283e-13
5.86271e-15	3.54744e-12	-6.50266e-14
-9.17873e-14	3.49861e-12	-3.09167e-13
-9.17873e-14	3.54744e-12	-4.55647e-13
-1.89447e-13	3.59626e-12	-5.53307e-13
-2.87097e-13	3.59626e-12	-6.99787e-13
-3.35927e-13	3.64509e-12	-7.97447e-13
-4.33587e-13	3.69392e-12	-8.95107e-13
-4.82417e-13	3.8404e-12	-9.92757e-13
-5.80067e-13	3.93806e-12	-9.92757e-13
-6.28897e-13	4.08454e-12	-9.92757e-13
-6.77727e-13	4.13337e-12	-9.92757e-13
-7.75387e-13	4.1822e-12	-9.92757e-13
-8.24207e-13	4.27986e-12	-9.43927e-13
-8.73037e-13	4.42634e-12	-9.43927e-13
-8.73037e-13	4.524e-12	-9.92757e-13
-8.73037e-13	4.67048e-12	-1.09042e-12
-8.73037e-13	4.81697e-12	-1.18807e-12
-8.24207e-13	5.01228e-12	-1.28573e-12
-7.75387e-13	5.20759e-12	-1.33456e-12
-7.26557e-13	5.35408e-12	-1.43222e-12
-7.26557e-13	5.45173e-12	-1.5787e-12
-7.26557e-13	5.50056e-12	-1.67635e-12
-6.77727e-13	5.59822e-12	-1.82284e-12
-7.26557e-13	5.69587e-12	-1.9205e-12
-7.75387e-13	5.84236e-12	-2.06698e-12
-8.24207e-13	6.03767e-12	-2.21346e-12
-8.73037e-13	6.18415e-12	-2.26229e-12
-9.21867e-13	6.33064e-12	-2.31112e-12
-9.70697e-13	6.47712e-12	-2.40878e-12
-9.70697e-13	6.62361e-12	-2.35995e-12
-9.70697e-13	6.72126e-12	-2.35995e-12
-9.21867e-13	6.81892e-12	-2.21346e-12
-8.73037e-13	6.81892e-12	-2.11581e-12
-7.75387e-13	6.72126e-12	-1.96932e-12
-6.28897e-13	6.62361e-12	-1.82284e-12
-5.31237e-13	6.47712e-12	-1.67635e-12
-3.35927e-13	6.28181e-12	-1.52987e-12
-1.89447e-13	6.03767e-12	-1.33456e-12
5.86271e-15	5.79353e-12	-1.2369e-12
2.01183e-13	5.54939e-12	-1.09042e-12
4.45323e-13	5.25642e-12	-9.43927e-13
4.94153e-13	5.01228e-12	-7.97447e-13
5.42973e-13	4.86579e-12	-6.50967e-13
5.42973e-13	4.76814e-12	-5.04477e-13
4.94153e-13	4.71931e-12	-3.09167e-13
2.98833e-13	4.81697e-12	-1.62677e-13
1.52353e-13	4.91462e-12	-1.61966e-14
-4.29573e-14	5.10993e-12	8.14634e-14
-1.89447e-13	5.25642e-12	1.30283e-13
-2.87097e-13	5.4029e-12	1.79113e-13
-4.33587e-13	5.50056e-12	1.79113e-13
-4.82417e-13	5.54939e-12	1.30283e-13
-5.31237e-13	5.54939e-12	3.26334e-14
-5.31237e-13	5.54939e-12	-1.13857e-13
-5.31237e-13	5.45173e-12	-2.60337e-13
-4.33587e-13	5.35408e-12	-3.57997e-13
-3.35927e-13	5.25642e-12	-4.06827e-13
-2.38277e-13	5.25642e-12	-4.55647e-13
-1.40617e-13	5.25642e-12	-4.06827e-13
-9.17873e-14	5.25642e-12	-4.06827e-13
-4.29573e-14	5.35408e-12	-4.06827e-13
-4.29573e-14	5.45173e-12	-3.57997e-13
5.86271e-15	5.59822e-12	-2.60337e-13
-4.29573e-14	5.7447e-12	-2.11507e-13
5.86271e-15	5.84236e-12	-1.62677e-13
-4.29573e-14	5.98884e-12	-1.13857e-13
-4.29573e-14	6.13532e-12	-6.50266e-14
-9.17873e-14	6.23298e-12	-6.50266e-14
-1.40617e-13	6.33064e-12	-6.50266e-14
-2.38277e-13	6.33064e-12	-6.50266e-14
-3.35927e-13	6.23298e-12	3.26334e-14
-3.84757e-13	6.18415e-12	8.14634e-14
-4.82417e-13	6.03767e-12	1.30283e-13
-4.82417e-13	5.94001e-12	2.27943e-13
-5.31237e-13	5.79353e-12	3.25603e-13
-5.31237e-13	5.69587e-12	4.72083e-13
-5.80067e-13	5.59822e-12	5.69743e-13
-6.77727e-13	5.50056e-12	6.67393e-13
-7.75387e-13	5.50056e-12	7.16223e-13
-8.73037e-13	5.35408e-12	7.65053e-13
-1.01953e-12	5.30525e-12	7.65053e-13
-1.11718e-12	5.15876e-12	7.16223e-13
-1.31249e-12	5.01228e-12	6.18563e-13
-1.45898e-12	4.91462e-12	5.20913e-13
-1.55663e-12	4.71931e-12	4.23253e-13
-1.70312e-12	4.57283e-12	3.25603e-13
-1.75195e-12	4.47517e-12	2.76773e-13
-1.8496e-12	4.37751e-12	2.27943e-13
-1.8496e-12	4.32869e-12	1.79113e-13
-1.94726e-12	4.32869e-12	1.79113e-13
-1.94726e-12	4.37751e-12	1.30283e-13
-1.94726e-12	4.47517e-12	1.30283e-13
-1.99609e-12	4.57283e-12	1.30283e-13
-1.94726e-12	4.62165e-12	1.30283e-13
-1.94726e-12	4.62165e-12	1.30283e-13
-1.99609e-12	4.67048e-12	1.79113e-13
-1.94726e-12	4.71931e-12	1.79113e-13
-1.94726e-12	4.71931e-12	1.79113e-13
-1.89843e-12	4.71931e-12	2.27943e-13
-1.89843e-12	4.71931e-12	2.27943e-13
-1.8496e-12	4.76814e-12	1.79113e-13
-1.75195e-12	4.76814e-12	1.30283e-13
-1.70312e-12	4.71931e-12	-1.61966e-14
-1.60546e-12	4.57283e-12	-2.11507e-13
-1.55663e-12	4.37751e-12	-4.06827e-13
-1.45898e-12	4.13337e-12	-6.99787e-13
-1.31249e-12	3.79158e-12	-1.04159e-12
-1.16601e-12	3.44978e-12	-1.43222e-12
-9.70697e-13	3.05915e-12	-1.82284e-12
-7.75387e-13	2.71736e-12	-2.21346e-12
-6.28897e-13	2.32674e-12	-2.60409e-12
-4.82417e-13	1.98494e-12	-2.94588e-12
-3.35927e-13	1.69197e-12	-3.23885e-12
-2.87097e-13	1.399e-12	-3.48299e-12
-2.87097e-13	1.15486e-12	-3.72713e-12
-3.35927e-13	9.59551e-13	-3.82479e-12
-4.33587e-13	7.15411e-13	-3.87362e-12
-5.80067e-13	5.68921e-13	-3.82479e-12
-7.75387e-13	4.22441e-13	-3.72713e-12
-9.70697e-13	2.75961e-13	-3.58065e-12
-1.11718e-12	1.78301e-13	-3.43417e-12
-1.31249e-12	1.29471e-13	-3.1412e-12
-1.45898e-12	1.29471e-13	-2.94588e-12
-1.55663e-12	1.29471e-13	-2.70174e-12
-1.65429e-12	8.06409e-14	-2.35995e-12
-1.70312e-12	8.06409e-14	-2.06698e-12
-1.70312e-12	3.18109e-14	-1.72518e-12
-1.65429e-12	-1.14669e-13	-1.33456e-12
-1.55663e-12	-2.61149e-13	-9.43927e-13
-1.5078e-12	-5.54119e-13	-6.02137e-13
-1.41015e-12	-8.47089e-13	-2.11507e-13
-1.26367e-12	-1.09123e-12	8.14634e-14
-1.11718e-12	-1.28654e-12	3.74423e-13
-1.01953e-12	-1.53068e-12	6.18563e-13
-9.70697e-13	-1.67717e-12	8.13883e-13
-9.21867e-13	-1.82365e-12	9.60363e-13
-8.24207e-13	-1.87248e-12	1.15567e-12
-8.24207e-13	-1.87248e-12	1.30216e-12
-7.75387e-13	-1.82365e-12	1.49747e-12
-7.75387e-13	-1.77482e-12	1.69278e-12
-6.77727e-13	-1.62834e-12	1.8881e-12
-6.28897e-13	-1.43303e-12	2.13224e-12
-5.31237e-13	-1.28654e-12	2.37638e-12
-4.82417e-13	-1.0424e-12	2.66934e-12
-4.33587e-13	-7.98259e-13	2.96231e-12
-3.35927e-13	-5.05289e-13	3.20645e-12
-2.87097e-13	-2.61149e-13	3.45059e-12
-2.87097e-13	-1.70091e-14	3.74356e-12
-2.87097e-13	2.27131e-13	3.89005e-12
-2.87097e-13	4.22441e-13	4.08536e-12
-2.87097e-13	6.17751e-13	4.28067e-12
-3.35927e-13	8.61891e-13	4.42716e-12
-3.35927e-13	1.00838e-12	4.47598e-12
-3.35927e-13	1.15486e-12	4.57364e-12
-3.35927e-13	1.20369e-12	4.62247e-12
-3.35927e-13	1.20369e-12	4.62247e-12
-3.35927e-13	1.20369e-12	4.62247e-12
-3.35927e-13	1.15486e-12	4.52481e-12
-3.35927e-13	1.0572e-12	4.47598e-12
-3.35927e-13	9.10721e-13	4.3295e-12
-3.84757e-13	7.15411e-13	4.18302e-12
-4.33587e-13	5.68921e-13	3.9877e-12
-5.31237e-13	4.22441e-13	3.89005e-12
-5.80067e-13	2.27131e-13	3.79239e-12
-6.77727e-13	3.18109e-14	3.69473e-12
-7.75387e-13	-1.14669e-13	3.59708e-12
-8.73037e-13	-3.09979e-13	3.54825e-12
-9.70697e-13	-5.05289e-13	3.49942e-12
-1.06835e-12	-7.49439e-13	3.49942e-12
-1.16601e-12	-9.93579e-13	3.40177e-12
-1.26367e-12	-1.28654e-12	3.40177e-12
-1.36132e-12	-1.57951e-12	3.30411e-12
-1.41015e-12	-1.87248e-12	3.20645e-12
-1.41015e-12	-2.11662e-12	3.1088e-12
-1.45898e-12	-2.31193e-12	2.96231e-12
-1.41015e-12	-2.50725e-12	2.81583e-12
-1.36132e-12	-2.65373e-12	2.66934e-12
-1.26367e-12	-2.70256e-12	2.62052e-12
-1.21484e-12	-2.65373e-12	2.52286e-12
-1.11718e-12	-2.6049e-12	2.47403e-12
-1.06835e-12	-2.40959e-12	2.47403e-12
-1.06835e-12	-2.21428e-12	2.47403e-12
-1.01953e-12	-1.97014e-12	2.47403e-12
-1.01953e-12	-1.726e-12	2.47403e-12
-9.70697e-13	-1.3842e-12	2.62052e-12
-9.70697e-13	-1.09123e-12	2.66934e-12
-9.70697e-13	-7.49439e-13	2.81583e-12
-8.24207e-13	-4.07639e-13	2.91349e-12
-8.24207e-13	-1.14669e-13	2.96231e-12
-7.26557e-13	1.29471e-13	2.96231e-12
-6.28897e-13	2.27131e-13	3.01114e-12
-6.28897e-13	4.22441e-13	2.96231e-12
-5.80067e-13	5.20101e-13	2.96231e-12
-5.80067e-13	5.68921e-13	2.91349e-12
-5.80067e-13	5.68921e-13	2.86466e-12
-5.80067e-13	5.68921e-13	2.81583e-12
-5.31237e-13	5.68921e-13	2.767e-12
-5.31237e-13	5.68921e-13	2.71817e-12
-5.31237e-13	6.17751e-13	2.66934e-12
-4.82417e-13	6.66581e-13	2.57169e-12
-4.82417e-13	7.64241e-13	2.47403e-12
-4.33587e-13	9.59551e-13	2.37638e-12
-4.33587e-13	1.20369e-12	2.22989e-12
-4.33587e-13	1.44783e-12	2.08341e-12
-3.84757e-13	1.64314e-12	1.8881e-12
-3.84757e-13	1.7408e-12	1.74161e-12
-3.35927e-13	1.83845e-12	1.59513e-12
-3.35927e-13	1.83845e-12	1.44864e-12
-2.87097e-13	1.7408e-12	1.30216e-12
-2.38277e-13	1.64314e-12	1.15567e-12
-1.40617e-13	1.49666e-12	1.10685e-12
-9.17873e-14	1.30135e-12	1.10685e-12
5.46927e-14	1.0572e-12	1.10685e-12
1.52353e-13	8.61891e-13	1.05802e-12
2.98833e-13	7.15411e-13	1.05802e-12
4.45323e-13	5.68921e-13	1.05802e-12
6.40633e-13	4.22441e-13	1.05802e-12
7.38293e-13	3.24781e-13	1.05802e-12
9.33603e-13	2.27131e-13	1.05802e-12
1.03125e-12	1.29471e-13	1.05802e-12
1.17774e-12	8.06409e-14	1.05802e-12
1.27539e-12	-1.70091e-14	1.10685e-12
1.37305e-12	-1.14669e-13	1.10685e-12
1.47071e-12	-1.63499e-13	1.05802e-12
1.47071e-12	-2.61149e-13	1.10685e-12
1.51954e-12	-2.61149e-13	1.10685e-12
1.51954e-12	-3.09979e-13	1.15567e-12
1.51954e-12	-3.09979e-13	1.2045e-12
1.47071e-12	-2.61149e-13	1.35099e-12
1.37305e-12	-2.61149e-13	1.44864e-12
1.22657e-12	-2.12329e-13	1.59513e-12
1.12891e-12	-2.61149e-13	1.79044e-12
1.03125e-12	-3.58809e-13	1.98575e-12
9.33603e-13	-5.54119e-13	2.18106e-12
8.35943e-13	-7.49439e-13	2.37638e-12
7.87113e-13	-9.93579e-13	2.57169e-12
7.38293e-13	-1.14006e-12	2.81583e-12
6.89463e-13	-1.23772e-12	2.96231e-12
7.38293e-13	-1.28654e-12	3.15763e-12
7.87113e-13	-1.33537e-12	3.30411e-12
8.84773e-13	-1.33537e-12	3.45059e-12
9.33603e-13	-1.33537e-12	3.59708e-12
9.82433e-13	-1.33537e-12	3.69473e-12
1.03125e-12	-1.33537e-12	3.79239e-12
1.03125e-12	-1.33537e-12	3.89005e-12
1.12891e-12	-1.3842e-12	3.93888e-12
1.17774e-12	-1.43303e-12	3.9877e-12
1.17774e-12	-1.53068e-12	3.9877e-12
1.17774e-12	-1.62834e-12	3.93888e-12
1.17774e-12	-1.67717e-12	3.89005e-12
1.12891e-12	-1.67717e-12	3.79239e-12
1.12891e-12	-1.62834e-12	3.59708e-12
1.08008e-12	-1.62834e-12	3.40177e-12
1.03125e-12	-1.57951e-12	3.20645e-12
9.82433e-13	-1.62834e-12	2.91349e-12
9.33603e-13	-1.726e-12	2.62052e-12
8.35943e-13	-1.82365e-12	2.37638e-12
7.38293e-13	-2.01896e-12	2.08341e-12
6.40633e-13	-2.26311e-12	1.83927e-12
5.42973e-13	-2.45842e-12	1.59513e-12
4.45323e-13	-2.75139e-12	1.30216e-12
3.47663e-13	-2.99553e-12	1.15567e-12
2.98833e-13	-3.2885e-12	1.05802e-12
2.98833e-13	-3.63029e-12	9.11533e-13
2.98833e-13	-3.97209e-12	8.62713e-13
3.47663e-13	-4.31388e-12	7.65053e-13
4.94153e-13	-4.65568e-12	8.13883e-13
5.42973e-13	-4.85099e-12	8.13883e-13
5.91803e-13	-4.99748e-12	9.11533e-13
6.89463e-13	-4.99748e-12	1.00919e-12
7.38293e-13	-4.94865e-12	1.15567e-12
7.38293e-13	-4.89982e-12	1.2045e-12
7.38293e-13	-4.80217e-12	1.30216e-12
6.89463e-13	-4.70451e-12	1.30216e-12
5.91803e-13	-4.65568e-12	1.30216e-12
5.91803e-13	-4.55802e-12	1.25333e-12
4.45323e-13	-4.41154e-12	1.2045e-12
3.96493e-13	-4.31388e-12	1.15567e-12
3.47663e-13	-4.21623e-12	1.10685e-12
2.98833e-13	-4.11857e-12	1.05802e-12
2.50003e-13	-4.06974e-12	1.00919e-12
2.01183e-13	-3.97209e-12	9.60363e-13
1.52353e-13	-3.97209e-12	9.60363e-13
1.03523e-13	-4.02092e-12	9.11533e-13
5.46927e-14	-4.11857e-12	8.62713e-13
5.86271e-15	-4.1674e-12	8.62713e-13
5.86271e-15	-4.1674e-12	9.60363e-13
-4.29573e-14	-4.1674e-12	1.05802e-12
-9.17873e-14	-4.21623e-12	1.15567e-12
-1.89447e-13	-4.21623e-12	1.25333e-12
-2.38277e-13	-4.21623e-12	1.39981e-12
-2.87097e-13	-4.21623e-12	1.44864e-12
-3.35927e-13	-4.11857e-12	1.49747e-12
-3.84757e-13	-4.02092e-12	1.59513e-12
-4.33587e-13	-3.97209e-12	1.59513e-12
-4.82417e-13	-3.92326e-12	1.5463e-12
-5.31237e-13	-3.92326e-12	1.44864e-12
-5.31237e-13	-3.97209e-12	1.39981e-12
-5.80067e-13	-4.06974e-12	1.25333e-12
-5.80067e-13	-4.21623e-12	1.15567e-12
-5.31237e-13	-4.36271e-12	1.00919e-12
-5.31237e-13	-4.5092e-12	8.62713e-13
-5.80067e-13	-4.70451e-12	7.16223e-13
-5.31237e-13	-4.80217e-12	5.69743e-13
-5.31237e-13	-4.85099e-12	4.72083e-13
-5.31237e-13	-4.85099e-12	3.74423e-13
-5.31237e-13	-4.75334e-12	2.76773e-13
-5.80067e-13	-4.70451e-12	2.27943e-13
-6.28897e-13	-4.55802e-12	1.30283e-13
-6.77727e-13	-4.41154e-12	8.14634e-14
-7.26557e-13	-4.21623e-12	3.26334e-14
-8.24207e-13	-4.06974e-12	-6.50266e-14
-8.24207e-13	-3.92326e-12	-1.62677e-13
-8.73037e-13	-3.8256e-12	-2.60337e-13
-9.21867e-13	-3.77678e-12	-4.06827e-13
-9.21867e-13	-3.72795e-12	-6.02137e-13
-9.70697e-13	-3.67912e-12	-7.97447e-13
-1.01953e-12	-3.58146e-12	-9.92757e-13
-1.06835e-12	-3.53264e-12	-1.13924e-12
-1.16601e-12	-3.38615e-12	-1.28573e-12
-1.26367e-12	-3.19084e-12	-1.48104e-12
-1.36132e-12	-2.99553e-12	-1.67635e-12
-1.41015e-12	-2.80021e-12	-1.77401e-12
-1.41015e-12	-2.55607e-12	-1.87167e-12
-1.36132e-12	-2.40959e-12	-1.96932e-12
-1.36132e-12	-2.26311e-12	-2.01815e-12
-1.21484e-12	-2.11662e-12	-2.01815e-12
-1.11718e-12	-2.01896e-12	-1.96932e-12
-9.70697e-13	-1.92131e-12	-1.87167e-12
-8.24207e-13	-1.87248e-12	-1.72518e-12
-6.77727e-13	-1.87248e-12	-1.48104e-12
-5.80067e-13	-1.87248e-12	-1.18807e-12
-4.33587e-13	-1.92131e-12	-8.95107e-13
-3.84757e-13	-1.92131e-12	-6.50967e-13
-3.35927e-13	-1.97014e-12	-3.09167e-13
-3.35927e-13	-2.01896e-12	-1.61966e-14
-3.84757e-13	-2.06779e-12	2.76773e-13
-4.33587e-13	-2.01896e-12	4.72083e-13
-5.80067e-13	-1.92131e-12	6.18563e-13
-7.75387e-13	-1.82365e-12	7.16223e-13
-9.21867e-13	-1.62834e-12	8.13883e-13
-1.11718e-12	-1.3842e-12	8.13883e-13
-1.26367e-12	-1.14006e-12	8.13883e-13
-1.41015e-12	-8.47089e-13	7.16223e-13
-1.45898e-12	-5.54119e-13	6.18563e-13
-1.5078e-12	-3.09979e-13	4.72083e-13
-1.55663e-12	-1.14669e-13	3.74423e-13
-1.55663e-12	8.06409e-14	2.27943e-13
-1.55663e-12	1.78301e-13	1.30283e-13
-1.55663e-12	1.78301e-13	8.14634e-14
-1.55663e-12	1.29471e-13	3.26334e-14
-1.45898e-12	3.18109e-14	3.26334e-14
-1.41015e-12	-1.14669e-13	8.14634e-14
-1.36132e-12	-2.12329e-13	8.14634e-14
-1.26367e-12	-3.58809e-13	8.14634e-14
-1.21484e-12	-4.07639e-13	1.79113e-13
-1.21484e-12	-5.05289e-13	1.79113e-13
-1.16601e-12	-5.54119e-13	2.76773e-13
-1.21484e-12	-6.02949e-13	4.23253e-13
-1.21484e-12	-6.02949e-13	6.18563e-13
-1.21484e-12	-6.02949e-13	8.62713e-13
-1.26367e-12	-5.54119e-13	1.10685e-12
-1.26367e-12	-5.54119e-13	1.44864e-12
-1.26367e-12	-6.02949e-13	1.79044e-12
-1.26367e-12	-5.54119e-13	2.08341e-12
-1.21484e-12	-5.54119e-13	2.37638e-12
-1.21484e-12	-5.05289e-13	2.62052e-12
-1.16601e-12	-5.05289e-13	2.91349e-12
-1.11718e-12	-5.05289e-13	3.1088e-12
-1.11718e-12	-4.56469e-13	3.30411e-12
-1.11718e-12	-4.07639e-13	3.49942e-12
-1.06835e-12	-3.09979e-13	3.59708e-12
-1.01953e-12	-2.61149e-13	3.69473e-12
-9.70697e-13	-1.63499e-13	3.74356e-12
-8.73037e-13	-1.14669e-13	3.69473e-12
-7.26557e-13	-1.14669e-13	3.64591e-12
-5.80067e-13	-6.58391e-14	3.59708e-12
-3.84757e-13	3.18109e-14	3.45059e-12
-2.87097e-13	3.18109e-14	3.30411e-12
-4.29573e-14	8.06409e-14	3.05997e-12
5.46927e-14	3.18109e-14	2.767e-12
2.01183e-13	3.18109e-14	2.52286e-12
2.98833e-13	-1.70091e-14	2.22989e-12
3.96493e-13	-1.14669e-13	1.98575e-12
4.45323e-13	-2.61149e-13	1.74161e-12
4.45323e-13	-4.07639e-13	1.5463e-12
4.94153e-13	-6.02949e-13	1.35099e-12
4.45323e-13	-7.98259e-13	1.15567e-12
4.45323e-13	-9.93579e-13	1.00919e-12
3.96493e-13	-1.14006e-12	8.13883e-13
3.47663e-13	-1.28654e-12	6.67393e-13
3.47663e-13	-1.33537e-12	4.23253e-13
3.47663e-13	-1.3842e-12	1.30283e-13
3.47663e-13	-1.48186e-12	-1.62677e-13
3.47663e-13	-1.57951e-12	-5.53307e-13
4.45323e-13	-1.62834e-12	-8.95107e-13
5.42973e-13	-1.726e-12	-1.28573e-12
6.40633e-13	-1.77482e-12	-1.67635e-12
7.38293e-13	-1.82365e-12	-1.96932e-12
8.84773e-13	-1.87248e-12	-2.21346e-12
1.03125e-12	-1.82365e-12	-2.31112e-12
1.17774e-12	-1.726e-12	-2.40878e-12
1.27539e-12	-1.57951e-12	-2.31112e-12
1.32422e-12	-1.43303e-12	-2.21346e-12
1.37305e-12	-1.23772e-12	-1.96932e-12
1.27539e-12	-1.09123e-12	-1.67635e-12
1.22657e-12	-1.0424e-12	-1.33456e-12
1.12891e-12	-9.93579e-13	-9.43927e-13
1.03125e-12	-1.09123e-12	-5.04477e-13
9.33603e-13	-1.18889e-12	-1.13857e-13
8.84773e-13	-1.23772e-12	2.76773e-13
7.87113e-13	-1.28654e-12	6.67393e-13
6.89463e-13	-1.3842e-12	1.00919e-12
6.40633e-13	-1.48186e-12	1.30216e-12
5.91803e-13	-1.62834e-12	1.49747e-12
5.91803e-13	-1.726e-12	1.64395e-12
5.42973e-13	-1.82365e-12	1.69278e-12
4.45323e-13	-1.97014e-12	1.64395e-12
3.47663e-13	-2.06779e-12	1.5463e-12
2.98833e-13	-2.11662e-12	1.35099e-12
1.03523e-13	-2.16545e-12	1.15567e-12
-4.29573e-14	-2.16545e-12	9.11533e-13
-1.89447e-13	-2.11662e-12	5.69743e-13
-2.87097e-13	-2.11662e-12	2.76773e-13
-3.84757e-13	-2.06779e-12	3.26334e-14
-4.82417e-13	-2.01896e-12	-2.60337e-13
-4.33587e-13	-1.97014e-12	-5.53307e-13
-4.33587e-13	-1.87248e-12	-7.97447e-13
-3.35927e-13	-1.77482e-12	-9.92757e-13
-2.38277e-13	-1.67717e-12	-1.18807e-12
-1.40617e-13	-1.57951e-12	-1.28573e-12
-4.29573e-14	-1.43303e-12	-1.33456e-12
5.46927e-14	-1.3842e-12	-1.33456e-12
1.03523e-13	-1.3842e-12	-1.33456e-12
1.52353e-13	-1.3842e-12	-1.38339e-12
2.01183e-13	-1.3842e-12	-1.33456e-12
2.50003e-13	-1.33537e-12	-1.33456e-12
2.50003e-13	-1.28654e-12	-1.38339e-12
2.50003e-13	-1.23772e-12	-1.33456e-12
3.47663e-13	-1.14006e-12	-1.33456e-12
3.47663e-13	-9.93579e-13	-1.38339e-12
3.47663e-13	-7.98259e-13	-1.38339e-12
3.47663e-13	-6.02949e-13	-1.43222e-12
2.98833e-13	-4.56469e-13	-1.52987e-12
2.50003e-13	-3.09979e-13	-1.5787e-12
1.52353e-13	-2.61149e-13	-1.67635e-12
5.46927e-14	-1.63499e-13	-1.77401e-12
-9.17873e-14	-1.70091e-14	-1.87167e-12
-1.89447e-13	-1.70091e-14	-2.01815e-12
-3.35927e-13	3.18109e-14	-2.16463e-12
-4.82417e-13	3.18109e-14	-2.31112e-12
-5.80067e-13	-6.58391e-14	-2.50643e-12
-6.28897e-13	-1.63499e-13	-2.60409e-12
-6.77727e-13	-2.61149e-13	-2.75057e-12
-6.28897e-13	-4.07639e-13	-2.7994e-12
-5.31237e-13	-6.02949e-13	-2.89706e-12
-4.33587e-13	-7.49439e-13	-2.94588e-12
-3.84757e-13	-8.95919e-13	-2.94588e-12
-2.87097e-13	-9.93579e-13	-2.94588e-12
-1.89447e-13	-1.09123e-12	-2.84823e-12
-1.40617e-13	-1.09123e-12	-2.7994e-12
-9.17873e-14	-1.0424e-12	-2.65292e-12
-4.29573e-14	-9.44749e-13	-2.4576e-12
-4.29573e-14	-8.47089e-13	-2.21346e-12
-4.29573e-14	-7.49439e-13	-2.01815e-12
-4.29573e-14	-5.05289e-13	-1.77401e-12
-4.29573e-14	-3.09979e-13	-1.52987e-12
-4.29573e-14	-6.58391e-14	-1.33456e-12
-4.29573e-14	1.78301e-13	-1.13924e-12
5.86271e-15	2.75961e-13	-8.95107e-13
5.86271e-15	4.71271e-13	-6.99787e-13
1.03523e-13	6.17751e-13	-5.04477e-13
1.52353e-13	7.15411e-13	-2.60337e-13
2.01183e-13	7.64241e-13	-6.50266e-14
2.01183e-13	8.13061e-13	1.30283e-13
2.50003e-13	8.61891e-13	2.76773e-13
2.50003e-13	8.13061e-13	4.23253e-13
1.52353e-13	8.13061e-13	4.72083e-13
5.46927e-14	7.64241e-13	5.69743e-13
-4.29573e-14	7.15411e-13	5.69743e-13
-1.89447e-13	6.66581e-13	5.69743e-13
-3.35927e-13	6.66581e-13	6.18563e-13
-4.82417e-13	6.66581e-13	6.18563e-13
-6.28897e-13	6.66581e-13	6.67393e-13
-7.75387e-13	7.15411e-13	7.16223e-13
-8.73037e-13	7.15411e-13	7.16223e-13
-8.73037e-13	7.64241e-13	6.67393e-13
-8.73037e-13	7.64241e-13	6.18563e-13
-8.24207e-13	7.64241e-13	5.20913e-13
-7.75387e-13	7.15411e-13	4.72083e-13
-6.28897e-13	6.66581e-13	4.23253e-13
-5.80067e-13	6.17751e-13	4.23253e-13
-4.33587e-13	5.20101e-13	4.72083e-13
-3.84757e-13	3.73611e-13	4.72083e-13
-3.35927e-13	2.27131e-13	5.69743e-13
-2.87097e-13	1.29471e-13	5.69743e-13
-2.38277e-13	3.18109e-14	5.69743e-13
-2.38277e-13	-1.70091e-14	5.69743e-13
-2.38277e-13	-1.14669e-13	4.72083e-13
-2.38277e-13	-1.70091e-14	3.74423e-13
-2.38277e-13	8.06409e-14	2.76773e-13
-2.38277e-13	2.75961e-13	1.30283e-13
-1.89447e-13	5.20101e-13	3.26334e-14
-9.17873e-14	8.13061e-13	-1.13857e-13
-4.29573e-14	1.0572e-12	-2.11507e-13
5.46927e-14	1.30135e-12	-2.60337e-13
2.01183e-13	1.49666e-12	-2.60337e-13
2.98833e-13	1.59431e-12	-2.60337e-13
4.45323e-13	1.64314e-12	-2.11507e-13
5.91803e-13	1.59431e-12	-1.13857e-13
6.89463e-13	1.54548e-12	-1.61966e-14
7.38293e-13	1.44783e-12	-1.61966e-14
7.87113e-13	1.20369e-12	8.14634e-14
8.35943e-13	9.59551e-13	1.30283e-13
8.35943e-13	6.66581e-13	1.30283e-13
7.87113e-13	3.73611e-13	1.79113e-13
7.87113e-13	1.29471e-13	1.30283e-13
7.87113e-13	-1.14669e-13	8.14634e-14
7.87113e-13	-3.09979e-13	3.26334e-14
7.38293e-13	-4.56469e-13	-6.50266e-14
7.38293e-13	-5.05289e-13	-1.13857e-13
7.38293e-13	-5.05289e-13	-2.11507e-13
6.89463e-13	-5.05289e-13	-3.09167e-13
6.89463e-13	-4.56469e-13	-4.06827e-13
6.89463e-13	-4.07639e-13	-5.53307e-13
6.89463e-13	-3.58809e-13	-6.99787e-13
6.89463e-13	-3.58809e-13	-8.46277e-13
6.40633e-13	-4.07639e-13	-9.92757e-13
5.91803e-13	-4.07639e-13	-1.13924e-12
5.42973e-13	-5.54119e-13	-1.33456e-12
4.94153e-13	-6.02949e-13	-1.43222e-12
4.45323e-13	-7.00609e-13	-1.62753e-12
4.45323e-13	-8.47089e-13	-1.82284e-12
4.45323e-13	-9.44749e-13	-1.96932e-12
4.94153e-13	-1.09123e-12	-2.16463e-12
5.42973e-13	-1.18889e-12	-2.35995e-12
5.42973e-13	-1.28654e-12	-2.50643e-12
5.91803e-13	-1.28654e-12	-2.65292e-12
5.91803e-13	-1.23772e-12	-2.75057e-12
5.91803e-13	-1.18889e-12	-2.84823e-12
5.42973e-13	-1.14006e-12	-2.84823e-12
5.42973e-13	-9.93579e-13	-2.7994e-12
4.94153e-13	-8.47089e-13	-2.7994e-12
4.45323e-13	-6.51779e-13	-2.65292e-12
4.45323e-13	-4.56469e-13	-2.50643e-12
3.96493e-13	-2.12329e-13	-2.31112e-12
3.47663e-13	3.18109e-14	-2.01815e-12
3.47663e-13	2.27131e-13	-1.72518e-12
2.98833e-13	4.22441e-13	-1.43222e-12
2.50003e-13	5.68921e-13	-1.04159e-12
2.50003e-13	6.66581e-13	-6.99787e-13
1.52353e-13	7.15411e-13	-2.60337e-13
1.52353e-13	7.15411e-13	1.79113e-13
1.03523e-13	7.15411e-13	6.18563e-13
1.03523e-13	6.66581e-13	1.00919e-12
5.46927e-14	6.66581e-13	1.39981e-12
1.03523e-13	6.66581e-13	1.69278e-12
2.01183e-13	7.15411e-13	1.93692e-12
2.50003e-13	7.64241e-13	2.08341e-12
3.96493e-13	8.13061e-13	2.22989e-12
4.94153e-13	8.61891e-13	2.27872e-12
5.42973e-13	9.10721e-13	2.27872e-12
5.91803e-13	9.59551e-13	2.22989e-12
6.89463e-13	9.59551e-13	2.13224e-12
7.38293e-13	9.59551e-13	1.98575e-12
7.87113e-13	9.10721e-13	1.83927e-12
8.84773e-13	8.61891e-13	1.74161e-12
8.84773e-13	8.13061e-13	1.69278e-12
9.33603e-13	7.15411e-13	1.64395e-12
9.82433e-13	6.66581e-13	1.64395e-12
1.03125e-12	6.17751e-13	1.64395e-12
1.08008e-12	6.17751e-13	1.79044e-12
1.08008e-12	5.68921e-13	1.8881e-12
1.08008e-12	5.20101e-13	2.08341e-12
1.08008e-12	5.68921e-13	2.27872e-12
1.08008e-12	5.68921e-13	2.52286e-12
1.03125e-12	5.68921e-13	2.767e-12
1.03125e-12	5.68921e-13	3.01114e-12
9.82433e-13	5.20101e-13	3.35294e-12
8.84773e-13	5.20101e-13	3.64591e-12
7.87113e-13	4.22441e-13	3.93888e-12
7.38293e-13	3.24781e-13	4.28067e-12
6.40633e-13	1.78301e-13	4.62247e-12
5.91803e-13	8.06409e-14	4.91544e-12
5.42973e-13	-6.58391e-14	5.15958e-12
4.45323e-13	-1.14669e-13	5.40372e-12
3.96493e-13	-2.61149e-13	5.5502e-12
3.47663e-13	-3.09979e-13	5.64786e-12
2.50003e-13	-4.07639e-13	5.69668e-12
2.50003e-13	-5.05289e-13	5.74551e-12
2.50003e-13	-5.54119e-13	5.69668e-12
2.50003e-13	-6.02949e-13	5.59903e-12
2.01183e-13	-6.02949e-13	5.5502e-12
2.01183e-13	-6.02949e-13	5.40372e-12
2.01183e-13	-6.02949e-13	5.40372e-12
1.03523e-13	-5.54119e-13	5.40372e-12
1.03523e-13	-5.05289e-13	5.40372e-12
5.86271e-15	-5.05289e-13	5.45255e-12
-4.29573e-14	-4.56469e-13	5.5502e-12
-1.89447e-13	-4.56469e-13	5.59903e-12
-1.89447e-13	-4.07639e-13	5.69668e-12
-2.38277e-13	-3.09979e-13	5.74551e-12
-2.38277e-13	-3.58809e-13	5.79434e-12
-1.89447e-13	-3.58809e-13	5.892e-12
-1.40617e-13	-4.07639e-13	5.94083e-12
-1.40617e-13	-4.56469e-13	6.03848e-12
-4.29573e-14	-4.56469e-13	6.03848e-12
5.86271e-15	-4.07639e-13	6.08731e-12
5.46927e-14	-3.58809e-13	6.03848e-12
1.03523e-13	-3.58809e-13	5.98966e-12
1.03523e-13	-2.61149e-13	5.892e-12
1.03523e-13	-1.63499e-13	5.74551e-12
1.03523e-13	-1.14669e-13	5.50137e-12
1.03523e-13	-6.58391e-14	5.25723e-12
1.52353e-13	-1.14669e-13	5.06192e-12
2.01183e-13	-1.14669e-13	4.86661e-12
2.01183e-13	-1.63499e-13	4.62247e-12
2.50003e-13	-2.61149e-13	4.42716e-12
2.50003e-13	-3.58809e-13	4.23184e-12
3.47663e-13	-5.05289e-13	4.03653e-12
3.47663e-13	-6.02949e-13	3.89005e-12
4.45323e-13	-7.00609e-13	3.74356e-12
5.42973e-13	-7.98259e-13	3.59708e-12
6.40633e-13	-8.95919e-13	3.45059e-12
7.38293e-13	-1.0424e-12	3.25528e-12
7.87113e-13	-1.14006e-12	3.01114e-12
7.38293e-13	-1.18889e-12	2.71817e-12
7.38293e-13	-1.23772e-12	2.37638e-12
6.40633e-13	-1.28654e-12	2.03458e-12
4.94153e-13	-1.28654e-12	1.59513e-12
3.47663e-13	-1.23772e-12	1.15567e-12
2.01183e-13	-1.09123e-12	7.16223e-13
5.46927e-14	-9.44749e-13	3.25603e-13
-1.40617e-13	-7.49439e-13	-6.50266e-14
-2.87097e-13	-6.02949e-13	-4.55647e-13
-4.82417e-13	-4.56469e-13	-7.48617e-13
-5.80067e-13	-3.09979e-13	-1.04159e-12
-6.77727e-13	-3.09979e-13	-1.28573e-12
-7.75387e-13	-3.09979e-13	-1.48104e-12
-9.21867e-13	-4.56469e-13	-1.62753e-12
-9.21867e-13	-6.51779e-13	-1.77401e-12
-1.01953e-12	-8.47089e-13	-1.9205e-12
-1.01953e-12	-1.09123e-12	-2.01815e-12
-1.01953e-12	-1.28654e-12	-2.11581e-12
-9.70697e-13	-1.43303e-12	-2.21346e-12
-8.73037e-13	-1.48186e-12	-2.31112e-12
-7.26557e-13	-1.53068e-12	-2.40878e-12
-5.80067e-13	-1.57951e-12	-2.50643e-12
-3.84757e-13	-1.57951e-12	-2.55526e-12
-1.40617e-13	-1.57951e-12	-2.65292e-12
5.46927e-14	-1.57951e-12	-2.75057e-12
2.01183e-13	-1.48186e-12	-2.75057e-12
3.47663e-13	-1.3842e-12	-2.70174e-12
4.45323e-13	-1.28654e-12	-2.55526e-12
4.94153e-13	-1.09123e-12	-2.35995e-12
5.42973e-13	-8.95919e-13	-2.11581e-12
4.94153e-13	-6.51779e-13	-1.77401e-12
4.45323e-13	-3.58809e-13	-1.43222e-12
3.47663e-13	-1.14669e-13	-1.09042e-12
2.50003e-13	1.78301e-13	-7.48617e-13
5.46927e-14	3.73611e-13	-4.06827e-13
-4.29573e-14	5.68921e-13	-1.13857e-13
-1.40617e-13	7.64241e-13	1.79113e-13
-2.38277e-13	9.59551e-13	3.74423e-13
-2.38277e-13	1.0572e-12	5.69743e-13
-2.38277e-13	1.10603e-12	6.67393e-13
-1.89447e-13	1.15486e-12	7.65053e-13
-1.40617e-13	1.10603e-12	8.62713e-13
-4.29573e-14	1.0572e-12	9.11533e-13
1.03523e-13	1.00838e-12	1.00919e-12
2.50003e-13	9.10721e-13	1.10685e-12
4.45323e-13	7.64241e-13	1.25333e-12
5.91803e-13	6.17751e-13	1.35099e-12
7.38293e-13	4.22441e-13	1.49747e-12
8.35943e-13	2.75961e-13	1.59513e-12
8.84773e-13	8.06409e-14	1.74161e-12
9.33603e-13	-1.70091e-14	1.83927e-12
9.82433e-13	-1.63499e-13	1.93692e-12
9.33603e-13	-3.09979e-13	2.03458e-12
8.35943e-13	-4.56469e-13	2.08341e-12
7.87113e-13	-5.05289e-13	2.18106e-12
5.91803e-13	-5.54119e-13	2.27872e-12
4.45323e-13	-5.54119e-13	2.4252e-12
2.98833e-13	-5.05289e-13	2.52286e-12
1.52353e-13	-4.07639e-13	2.62052e-12
5.86271e-15	-3.09979e-13	2.66934e-12
-1.89447e-13	-2.12329e-13	2.66934e-12
-3.84757e-13	-6.58391e-14	2.66934e-12
-5.31237e-13	8.06409e-14	2.57169e-12
-6.77727e-13	1.78301e-13	2.47403e-12
-7.75387e-13	2.75961e-13	2.37638e-12
-8.24207e-13	2.27131e-13	2.22989e-12
-8.73037e-13	1.78301e-13	2.13224e-12
-8.73037e-13	8.06409e-14	2.03458e-12
-8.24207e-13	-1.14669e-13	1.83927e-12
-7.75387e-13	-3.09979e-13	1.74161e-12
-7.26557e-13	-5.05289e-13	1.5463e-12
-6.28897e-13	-6.51779e-13	1.39981e-12
-5.31237e-13	-7.49439e-13	1.25333e-12
-4.33587e-13	-8.47089e-13	1.15567e-12
-2.87097e-13	-7.98259e-13	1.05802e-12
-1.40617e-13	-7.98259e-13	1.00919e-12
5.86271e-15	-7.00609e-13	9.11533e-13
1.03523e-13	-6.02949e-13	8.13883e-13
2.01183e-13	-5.05289e-13	7.16223e-13
2.98833e-13	-3.58809e-13	5.69743e-13
3.47663e-13	-3.58809e-13	4.72083e-13
3.47663e-13	-3.09979e-13	3.25603e-13
3.96493e-13	-3.58809e-13	1.30283e-13
3.47663e-13	-4.07639e-13	-1.61966e-14
2.98833e-13	-4.56469e-13	-3.09167e-13
2.01183e-13	-5.05289e-13	-5.04477e-13
1.03523e-13	-6.02949e-13	-7.48617e-13
-4.29573e-14	-6.51779e-13	-9.43927e-13
-1.89447e-13	-7.00609e-13	-1.13924e-12
-3.35927e-13	-7.49439e-13	-1.38339e-12
-4.82417e-13	-7.49439e-13	-1.52987e-12
-6.28897e-13	-7.49439e-13	-1.62753e-12
-8.24207e-13	-7.00609e-13	-1.77401e-12
-1.01953e-12	-6.51779e-13	-1.82284e-12
-1.21484e-12	-5.05289e-13	-1.82284e-12
-1.41015e-12	-3.09979e-13	-1.77401e-12
-1.55663e-12	-6.58391e-14	-1.62753e-12
-1.70312e-12	2.27131e-13	-1.52987e-12
-1.80078e-12	4.22441e-13	-1.38339e-12
-1.8496e-12	5.68921e-13	-1.28573e-12
-1.8496e-12	7.15411e-13	-1.2369e-12
-1.80078e-12	8.13061e-13	-1.18807e-12
-1.70312e-12	8.61891e-13	-1.13924e-12
-1.60546e-12	8.61891e-13	-1.18807e-12
-1.41015e-12	7.64241e-13	-1.13924e-12
-1.26367e-12	7.15411e-13	-1.2369e-12
-1.06835e-12	5.68921e-13	-1.28573e-12
-8.24207e-13	4.22441e-13	-1.38339e-12
-6.28897e-13	2.75961e-13	-1.38339e-12
-3.84757e-13	1.29471e-13	-1.38339e-12
-1.40617e-13	3.18109e-14	-1.33456e-12
1.03523e-13	-1.14669e-13	-1.2369e-12
3.47663e-13	-2.61149e-13	-1.13924e-12
5.42973e-13	-3.09979e-13	-9.43927e-13
7.38293e-13	-3.58809e-13	-6.99787e-13
9.33603e-13	-2.61149e-13	-4.55647e-13
1.03125e-12	-2.12329e-13	-1.62677e-13
1.12891e-12	-1.14669e-13	1.30283e-13
1.12891e-12	3.18109e-14	4.23253e-13
1.12891e-12	2.75961e-13	7.16223e-13
1.08008e-12	4.71271e-13	9.60363e-13
9.82433e-13	7.15411e-13	1.15567e-12
8.84773e-13	9.59551e-13	1.35099e-12
6.89463e-13	1.10603e-12	1.49747e-12
5.91803e-13	1.25252e-12	1.64395e-12
4.45323e-13	1.35017e-12	1.79044e-12
2.98833e-13	1.35017e-12	1.8881e-12
1.03523e-13	1.30135e-12	2.03458e-12
-4.29573e-14	1.20369e-12	2.13224e-12
-1.89447e-13	1.15486e-12	2.22989e-12
-2.87097e-13	1.0572e-12	2.37638e-12
-4.33587e-13	1.00838e-12	2.52286e-12
-4.82417e-13	9.59551e-13	2.62052e-12
-5.80067e-13	8.61891e-13	2.71817e-12
-6.28897e-13	8.61891e-13	2.767e-12
-6.77727e-13	8.13061e-13	2.767e-12
-6.77727e-13	7.64241e-13	2.767e-12
-6.28897e-13	6.66581e-13	2.66934e-12
-5.80067e-13	5.68921e-13	2.57169e-12
-4.33587e-13	5.68921e-13	2.4252e-12
-3.84757e-13	5.20101e-13	2.18106e-12
-1.89447e-13	5.68921e-13	1.98575e-12
-4.29573e-14	6.17751e-13	1.79044e-12
1.52353e-13	7.15411e-13	1.5463e-12
3.47663e-13	8.13061e-13	1.35099e-12
4.94153e-13	9.10721e-13	1.2045e-12
6.89463e-13	1.00838e-12	1.05802e-12
7.87113e-13	1.0572e-12	9.60363e-13
8.84773e-13	1.0572e-12	1.00919e-12
8.35943e-13	1.0572e-12	1.05802e-12
8.84773e-13	1.0572e-12	1.15567e-12
7.87113e-13	1.0572e-12	1.35099e-12
6.89463e-13	1.0572e-12	1.5463e-12
5.91803e-13	1.00838e-12	1.79044e-12
4.94153e-13	1.00838e-12	1.98575e-12
4.45323e-13	9.10721e-13	2.22989e-12
3.47663e-13	8.61891e-13	2.4252e-12
2.98833e-13	7.64241e-13	2.52286e-12
2.01183e-13	6.66581e-13	2.57169e-12
1.52353e-13	5.68921e-13	2.62052e-12
2.01183e-13	5.20101e-13	2.57169e-12
1.52353e-13	4.22441e-13	2.47403e-12
2.01183e-13	3.73611e-13	2.37638e-12
2.50003e-13	3.24781e-13	2.22989e-12
2.50003e-13	2.75961e-13	2.08341e-12
2.98833e-13	2.27131e-13	1.93692e-12
2.98833e-13	1.29471e-13	1.83927e-12
3.96493e-13	8.06409e-14	1.64395e-12
4.45323e-13	3.18109e-14	1.5463e-12
5.42973e-13	8.06409e-14	1.35099e-12
6.40633e-13	1.78301e-13	1.2045e-12
6.89463e-13	3.24781e-13	1.05802e-12
7.87113e-13	4.71271e-13	9.11533e-13
8.84773e-13	6.17751e-13	7.65053e-13
8.84773e-13	6.66581e-13	6.18563e-13
9.33603e-13	8.13061e-13	5.20913e-13
9.33603e-13	8.61891e-13	3.74423e-13
9.33603e-13	9.10721e-13	3.74423e-13
9.33603e-13	9.10721e-13	3.74423e-13
8.84773e-13	8.61891e-13	4.23253e-13
7.87113e-13	8.61891e-13	6.18563e-13
7.38293e-13	8.13061e-13	8.13883e-13
6.40633e-13	7.64241e-13	1.00919e-12
5.91803e-13	6.66581e-13	1.25333e-12
5.42973e-13	5.68921e-13	1.49747e-12
4.94153e-13	4.22441e-13	1.69278e-12
4.45323e-13	2.27131e-13	1.93692e-12
4.45323e-13	3.18109e-14	2.22989e-12
4.45323e-13	-2.12329e-13	2.52286e-12
4.45323e-13	-4.56469e-13	2.767e-12
4.45323e-13	-7.00609e-13	3.01114e-12
4.45323e-13	-8.47089e-13	3.15763e-12
4.94153e-13	-9.93579e-13	3.30411e-12
4.45323e-13	-1.14006e-12	3.40177e-12
4.45323e-13	-1.23772e-12	3.45059e-12
4.45323e-13	-1.28654e-12	3.49942e-12
3.96493e-13	-1.3842e-12	3.59708e-12
2.98833e-13	-1.48186e-12	3.59708e-12
2.50003e-13	-1.53068e-12	3.59708e-12
1.52353e-13	-1.62834e-12	3.59708e-12
5.46927e-14	-1.67717e-12	3.49942e-12
5.86271e-15	-1.67717e-12	3.45059e-12
-9.17873e-14	-1.67717e-12	3.35294e-12
-1.40617e-13	-1.62834e-12	3.20645e-12
-1.40617e-13	-1.53068e-12	3.05997e-12
-1.40617e-13	-1.43303e-12	2.91349e-12
-1.40617e-13	-1.28654e-12	2.81583e-12
-9.17873e-14	-1.18889e-12	2.71817e-12
-9.17873e-14	-1.0424e-12	2.62052e-12
-4.29573e-14	-8.95919e-13	2.57169e-12
-9.17873e-14	-7.49439e-13	2.66934e-12
-1.40617e-13	-6.51779e-13	2.767e-12
-1.89447e-13	-5.54119e-13	2.81583e-12
-2.87097e-13	-4.56469e-13	2.96231e-12
-3.35927e-13	-3.09979e-13	3.05997e-12
-4.82417e-13	-2.12329e-13	3.15763e-12
-5.80067e-13	-1.14669e-13	3.20645e-12
-6.28897e-13	-6.58391e-14	3.20645e-12
-6.28897e-13	3.18109e-14	3.20645e-12
-6.28897e-13	8.06409e-14	3.1088e-12
-5.31237e-13	8.06409e-14	3.01114e-12
-3.84757e-13	1.29471e-13	2.81583e-12
-2.87097e-13	8.06409e-14	2.57169e-12
-1.89447e-13	8.06409e-14	2.22989e-12
-9.17873e-14	8.06409e-14	1.8881e-12
-9.17873e-14	1.29471e-13	1.49747e-12
-4.29573e-14	2.27131e-13	1.10685e-12
-9.17873e-14	2.75961e-13	7.16223e-13
-9.17873e-14	3.24781e-13	3.74423e-13
-9.17873e-14	3.24781e-13	3.26334e-14
-1.40617e-13	3.73611e-13	-2.60337e-13
-1.89447e-13	4.22441e-13	-5.04477e-13
-2.87097e-13	4.71271e-13	-7.48617e-13
-3.35927e-13	5.20101e-13	-8.95107e-13
-3.84757e-13	6.17751e-13	-9.92757e-13
-4.82417e-13	7.64241e-13	-1.13924e-12
-4.82417e-13	8.61891e-13	-1.2369e-12
-5.31237e-13	1.00838e-12	-1.28573e-12
-5.31237e-13	1.15486e-12	-1.28573e-12
-5.80067e-13	1.30135e-12	-1.2369e-12
-5.80067e-13	1.44783e-12	-1.18807e-12
-6.28897e-13	1.59431e-12	-1.09042e-12
-6.28897e-13	1.7408e-12	-9.43927e-13
-6.77727e-13	1.88728e-12	-7.97447e-13
-7.26557e-13	1.93611e-12	-6.50967e-13
-7.75387e-13	2.03376e-12	-4.55647e-13
-7.75387e-13	2.03376e-12	-2.60337e-13
-8.24207e-13	2.03376e-12	-1.61966e-14
-8.24207e-13	2.03376e-12	1.30283e-13
-8.24207e-13	1.93611e-12	3.25603e-13
-7.75387e-13	1.88728e-12	5.20913e-13
-6.77727e-13	1.78963e-12	6.18563e-13
-5.31237e-13	1.7408e-12	7.16223e-13
-3.84757e-13	1.69197e-12	8.13883e-13
-1.40617e-13	1.59431e-12	8.62713e-13
5.46927e-14	1.54548e-12	8.62713e-13
3.47663e-13	1.54548e-12	8.13883e-13
5.42973e-13	1.54548e-12	7.65053e-13
7.87113e-13	1.54548e-12	7.16223e-13
9.33603e-13	1.54548e-12	6.18563e-13
1.08008e-12	1.59431e-12	5.69743e-13
1.12891e-12	1.59431e-12	4.72083e-13
1.17774e-12	1.59431e-12	3.74423e-13
1.12891e-12	1.59431e-12	2.27943e-13
1.08008e-12	1.54548e-12	1.79113e-13
9.82433e-13	1.54548e-12	8.14634e-14
8.35943e-13	1.49666e-12	3.26334e-14
6.89463e-13	1.44783e-12	3.26334e-14
4.94153e-13	1.35017e-12	-1.61966e-14
2.98833e-13	1.25252e-12	-1.61966e-14
5.46927e-14	1.10603e-12	-1.61966e-14
-1.40617e-13	9.59551e-13	-6.50266e-14
-2.87097e-13	7.64241e-13	-6.50266e-14
-4.33587e-13	5.68921e-13	-1.13857e-13
-5.31237e-13	3.24781e-13	-2.11507e-13
-5.80067e-13	3.18109e-14	-3.09167e-13
-6.28897e-13	-2.12329e-13	-4.55647e-13
-6.77727e-13	-4.07639e-13	-5.53307e-13
-6.77727e-13	-6.51779e-13	-6.50967e-13
-6.77727e-13	-7.98259e-13	-6.50967e-13
-6.28897e-13	-9.44749e-13	-6.99787e-13
-5.80067e-13	-1.0424e-12	-7.48617e-13
-5.31237e-13	-1.14006e-12	-7.97447e-13
-5.31237e-13	-1.18889e-12	-7.97447e-13
-4.33587e-13	-1.23772e-12	-7.97447e-13
-3.35927e-13	-1.18889e-12	-7.48617e-13
-2.38277e-13	-1.14006e-12	-6.99787e-13
-1.40617e-13	-9.93579e-13	-6.99787e-13
-4.29573e-14	-7.00609e-13	-6.50967e-13
5.46927e-14	-4.07639e-13	-5.53307e-13
1.52353e-13	-6.58391e-14	-5.04477e-13
2.50003e-13	3.73611e-13	-4.06827e-13
3.47663e-13	7.64241e-13	-2.60337e-13
4.45323e-13	1.20369e-12	-1.13857e-13
5.42973e-13	1.54548e-12	-1.61966e-14
5.91803e-13	1.83845e-12	1.30283e-13
6.89463e-13	2.13142e-12	2.27943e-13
7.38293e-13	2.32674e-12	3.74423e-13
7.87113e-13	2.47322e-12	4.72083e-13
7.38293e-13	2.6197e-12	5.20913e-13
7.87113e-13	2.66853e-12	5.69743e-13
8.35943e-13	2.66853e-12	6.67393e-13
8.35943e-13	2.6197e-12	6.67393e-13
8.84773e-13	2.52205e-12	7.16223e-13
9.33603e-13	2.37556e-12	7.65053e-13
9.33603e-13	2.13142e-12	8.13883e-13
9.82433e-13	1.88728e-12	8.13883e-13
1.03125e-12	1.78963e-12	8.13883e-13
1.08008e-12	1.64314e-12	8.13883e-13
1.08008e-12	1.54548e-12	8.62713e-13
1.08008e-12	1.399e-12	8.62713e-13
1.12891e-12	1.30135e-12	9.11533e-13
1.08008e-12	1.15486e-12	9.60363e-13
9.82433e-13	9.10721e-13	9.60363e-13
9.33603e-13	5.68921e-13	9.60363e-13
8.35943e-13	2.75961e-13	9.60363e-13
7.38293e-13	-6.58391e-14	9.60363e-13
6.89463e-13	-3.09979e-13	1.00919e-12
6.40633e-13	-5.54119e-13	1.05802e-12
5.91803e-13	-7.00609e-13	1.05802e-12
5.42973e-13	-7.49439e-13	1.10685e-12
5.42973e-13	-7.00609e-13	1.15567e-12
4.94153e-13	-6.51779e-13	1.15567e-12
4.94153e-13	-5.54119e-13	1.2045e-12
4.45323e-13	-5.05289e-13	1.30216e-12
4.45323e-13	-5.05289e-13	1.35099e-12
4.45323e-13	-5.05289e-13	1.44864e-12
3.96493e-13	-5.54119e-13	1.5463e-12
3.47663e-13	-7.00609e-13	1.64395e-12
2.98833e-13	-8.95919e-13	1.74161e-12
2.50003e-13	-1.0424e-12	1.8881e-12
1.52353e-13	-1.18889e-12	1.98575e-12
5.46927e-14	-1.33537e-12	2.08341e-12
5.86271e-15	-1.43303e-12	2.18106e-12
-4.29573e-14	-1.53068e-12	2.13224e-12
-1.89447e-13	-1.53068e-12	2.13224e-12
-1.89447e-13	-1.53068e-12	2.03458e-12
-2.87097e-13	-1.53068e-12	1.8881e-12
-3.84757e-13	-1.48186e-12	1.74161e-12
-4.82417e-13	-1.48186e-12	1.64395e-12
-5.31237e-13	-1.48186e-12	1.5463e-12
-6.28897e-13	-1.53068e-12	1.49747e-12
-6.77727e-13	-1.57951e-12	1.49747e-12
-7.75387e-13	-1.67717e-12	1.49747e-12
-8.24207e-13	-1.77482e-12	1.59513e-12
-7.75387e-13	-1.87248e-12	1.69278e-12
-7.75387e-13	-2.01896e-12	1.79044e-12
-7.75387e-13	-2.11662e-12	1.83927e-12
-6.77727e-13	-2.11662e-12	1.93692e-12
-5.80067e-13	-2.06779e-12	1.93692e-12
-5.80067e-13	-1.97014e-12	1.98575e-12
-4.82417e-13	-1.82365e-12	2.03458e-12
-4.82417e-13	-1.62834e-12	1.98575e-12
-4.82417e-13	-1.43303e-12	2.03458e-12
-4.82417e-13	-1.18889e-12	1.98575e-12
-4.82417e-13	-9.93579e-13	1.93692e-12
-5.31237e-13	-7.49439e-13	1.8881e-12
-5.80067e-13	-5.54119e-13	1.83927e-12
-5.80067e-13	-2.61149e-13	1.74161e-12
-6.28897e-13	-1.70091e-14	1.69278e-12
-5.80067e-13	3.24781e-13	1.59513e-12
-5.80067e-13	6.66581e-13	1.5463e-12
-5.80067e-13	9.59551e-13	1.49747e-12
-4.82417e-13	1.30135e-12	1.39981e-12
-3.84757e-13	1.59431e-12	1.39981e-12
-2.87097e-13	1.83845e-12	1.35099e-12
-1.89447e-13	2.03376e-12	1.35099e-12
-9.17873e-14	2.18025e-12	1.30216e-12
5.86271e-15	2.18025e-12	1.30216e-12
5.46927e-14	2.18025e-12	1.25333e-12
1.52353e-13	2.13142e-12	1.25333e-12
1.52353e-13	2.03376e-12	1.2045e-12
1.52353e-13	1.93611e-12	1.2045e-12
1.52353e-13	1.78963e-12	1.10685e-12
1.52353e-13	1.59431e-12	1.05802e-12
1.03523e-13	1.44783e-12	1.00919e-12
5.46927e-14	1.20369e-12	1.00919e-12
5.46927e-14	9.59551e-13	1.00919e-12
5.46927e-14	6.66581e-13	1.05802e-12
5.46927e-14	4.22441e-13	1.15567e-12
1.03523e-13	2.27131e-13	1.30216e-12
1.52353e-13	1.29471e-13	1.44864e-12
2.01183e-13	1.78301e-13	1.59513e-12
2.01183e-13	2.27131e-13	1.79044e-12
2.50003e-13	3.73611e-13	1.93692e-12
2.98833e-13	4.71271e-13	2.08341e-12
3.47663e-13	5.68921e-13	2.22989e-12
3.47663e-13	6.66581e-13	2.32755e-12
3.47663e-13	7.15411e-13	2.37638e-12
2.98833e-13	7.15411e-13	2.37638e-12
2.98833e-13	7.15411e-13	2.4252e-12
2.50003e-13	7.15411e-13	2.4252e-12
2.01183e-13	6.66581e-13	2.37638e-12
1.52353e-13	6.66581e-13	2.32755e-12
5.46927e-14	6.17751e-13	2.22989e-12
-4.29573e-14	6.66581e-13	2.08341e-12
-9.17873e-14	7.15411e-13	1.98575e-12
-1.89447e-13	7.15411e-13	1.8881e-12
-2.38277e-13	7.15411e-13	1.74161e-12
-2.87097e-13	6.66581e-13	1.69278e-12
-3.35927e-13	5.68921e-13	1.64395e-12
-3.35927e-13	4.71271e-13	1.69278e-12
-3.35927e-13	3.73611e-13	1.69278e-12
-3.35927e-13	2.75961e-13	1.79044e-12
-2.87097e-13	2.27131e-13	1.8881e-12
-2.38277e-13	1.78301e-13	2.03458e-12
-1.40617e-13	1.29471e-13	2.18106e-12
-9.17873e-14	1.29471e-13	2.32755e-12
5.86271e-15	1.29471e-13	2.47403e-12
5.86271e-15	1.29471e-13	2.66934e-12
5.46927e-14	1.78301e-13	2.81583e-12
5.46927e-14	2.27131e-13	2.96231e-12
5.46927e-14	2.75961e-13	3.1088e-12
5.46927e-14	3.73611e-13	3.20645e-12
-4.29573e-14	4.22441e-13	3.30411e-12
-4.29573e-14	4.22441e-13	3.35294e-12
-4.29573e-14	4.22441e-13	3.45059e-12
-4.29573e-14	4.22441e-13	3.54825e-12
5.86271e-15	3.24781e-13	3.54825e-12
5.86271e-15	2.27131e-13	3.59708e-12
1.03523e-13	8.06409e-14	3.64591e-12
1.52353e-13	-1.70091e-14	3.69473e-12
2.50003e-13	-1.14669e-13	3.79239e-12
2.50003e-13	-1.63499e-13	3.93888e-12
3.47663e-13	-2.12329e-13	4.03653e-12
3.96493e-13	-1.63499e-13	4.18302e-12
3.96493e-13	-6.58391e-14	4.3295e-12
3.96493e-13	3.18109e-14	4.42716e-12
3.47663e-13	1.78301e-13	4.57364e-12
2.98833e-13	2.75961e-13	4.67129e-12
2.50003e-13	3.24781e-13	4.72012e-12
1.52353e-13	4.22441e-13	4.81778e-12
1.03523e-13	4.22441e-13	4.81778e-12
5.86271e-15	3.73611e-13	4.81778e-12
-4.29573e-14	3.24781e-13	4.76895e-12
5.86271e-15	2.75961e-13	4.67129e-12
1.03523e-13	2.75961e-13	4.57364e-12
2.01183e-13	3.24781e-13	4.42716e-12
2.98833e-13	3.73611e-13	4.3295e-12
4.45323e-13	4.22441e-13	4.23184e-12
5.42973e-13	3.73611e-13	4.08536e-12
5.91803e-13	3.24781e-13	3.93888e-12
6.40633e-13	2.27131e-13	3.74356e-12
5.91803e-13	1.29471e-13	3.59708e-12
5.42973e-13	-1.70091e-14	3.45059e-12
3.96493e-13	-2.12329e-13	3.35294e-12
2.50003e-13	-3.58809e-13	3.25528e-12
1.03523e-13	-5.54119e-13	3.25528e-12
-4.29573e-14	-7.49439e-13	3.25528e-12
-1.89447e-13	-9.44749e-13	3.30411e-12
-3.35927e-13	-1.14006e-12	3.35294e-12
-4.82417e-13	-1.33537e-12	3.40177e-12
-5.80067e-13	-1.57951e-12	3.45059e-12
-7.26557e-13	-1.726e-12	3.54825e-12
-8.24207e-13	-1.92131e-12	3.54825e-12
-9.21867e-13	-2.06779e-12	3.59708e-12
-1.01953e-12	-2.16545e-12	3.59708e-12
-1.06835e-12	-2.26311e-12	3.54825e-12
-1.11718e-12	-2.31193e-12	3.45059e-12
-1.16601e-12	-2.36076e-12	3.40177e-12
-1.21484e-12	-2.31193e-12	3.35294e-12
-1.21484e-12	-2.26311e-12	3.30411e-12
-1.16601e-12	-2.16545e-12	3.35294e-12
-1.16601e-12	-2.01896e-12	3.35294e-12
-1.11718e-12	-1.82365e-12	3.40177e-12
-1.01953e-12	-1.67717e-12	3.40177e-12
-9.21867e-13	-1.43303e-12	3.45059e-12
-7.75387e-13	-1.18889e-12	3.45059e-12
-6.28897e-13	-9.44749e-13	3.45059e-12
-4.82417e-13	-7.49439e-13	3.40177e-12
-2.87097e-13	-6.02949e-13	3.30411e-12
-1.40617e-13	-4.56469e-13	3.25528e-12
1.03523e-13	-3.58809e-13	3.1088e-12
2.50003e-13	-2.61149e-13	3.05997e-12
3.47663e-13	-1.63499e-13	2.96231e-12
4.94153e-13	-1.14669e-13	2.91349e-12
5.91803e-13	-1.70091e-14	2.81583e-12
5.91803e-13	3.18109e-14	2.767e-12
6.40633e-13	3.18109e-14	2.767e-12
6.40633e-13	8.06409e-14	2.81583e-12
5.91803e-13	1.29471e-13	2.81583e-12
5.91803e-13	1.78301e-13	2.86466e-12
5.42973e-13	2.75961e-13	2.86466e-12
4.45323e-13	3.73611e-13	2.96231e-12
3.96493e-13	5.20101e-13	3.01114e-12
2.98833e-13	5.68921e-13	3.15763e-12
2.01183e-13	6.17751e-13	3.25528e-12
1.03523e-13	6.17751e-13	3.40177e-12
5.86271e-15	5.68921e-13	3.54825e-12
5.86271e-15	3.73611e-13	3.74356e-12
-4.29573e-14	2.75961e-13	3.84122e-12
-4.29573e-14	8.06409e-14	3.9877e-12
-4.29573e-14	-1.14669e-13	4.13419e-12
5.86271e-15	-2.61149e-13	4.23184e-12
5.46927e-14	-3.58809e-13	4.37833e-12
1.03523e-13	-5.05289e-13	4.42716e-12
1.03523e-13	-6.02949e-13	4.42716e-12
2.01183e-13	-7.49439e-13	4.42716e-12
1.52353e-13	-8.95919e-13	4.37833e-12
2.01183e-13	-1.0424e-12	4.3295e-12
2.50003e-13	-1.14006e-12	4.23184e-12
2.98833e-13	-1.28654e-12	4.03653e-12
2.98833e-13	-1.33537e-12	3.93888e-12
3.47663e-13	-1.3842e-12	3.79239e-12
3.96493e-13	-1.28654e-12	3.59708e-12
3.96493e-13	-1.18889e-12	3.45059e-12
4.45323e-13	-9.93579e-13	3.30411e-12
5.42973e-13	-7.98259e-13	3.20645e-12
5.42973e-13	-5.54119e-13	3.1088e-12
5.91803e-13	-3.58809e-13	3.01114e-12
6.40633e-13	-2.12329e-13	2.91349e-12
6.89463e-13	-1.14669e-13	2.767e-12
7.38293e-13	-1.70091e-14	2.71817e-12
7.38293e-13	-1.70091e-14	2.62052e-12
7.87113e-13	-1.70091e-14	2.57169e-12
7.87113e-13	3.18109e-14	2.57169e-12
7.87113e-13	8.06409e-14	2.57169e-12
7.38293e-13	1.29471e-13	2.57169e-12
6.40633e-13	2.27131e-13	2.62052e-12
5.42973e-13	2.75961e-13	2.66934e-12
4.94153e-13	3.24781e-13	2.71817e-12
3.96493e-13	3.73611e-13	2.767e-12
3.47663e-13	4.22441e-13	2.81583e-12
2.98833e-13	4.22441e-13	2.767e-12
2.50003e-13	4.71271e-13	2.81583e-12
2.50003e-13	5.20101e-13	2.71817e-12
1.52353e-13	5.20101e-13	2.66934e-12
1.03523e-13	6.17751e-13	2.57169e-12
-4.29573e-14	6.66581e-13	2.47403e-12
-1.40617e-13	7.15411e-13	2.4252e-12
-1.89447e-13	7.15411e-13	2.37638e-12
-2.38277e-13	7.15411e-13	2.32755e-12
-2.38277e-13	7.15411e-13	2.27872e-12
-1.40617e-13	6.66581e-13	2.27872e-12
-4.29573e-14	6.17751e-13	2.27872e-12
5.46927e-14	5.20101e-13	2.27872e-12
1.52353e-13	4.71271e-13	2.27872e-12
2.01183e-13	4.71271e-13	2.32755e-12
2.50003e-13	5.20101e-13	2.4252e-12
2.98833e-13	5.68921e-13	2.47403e-12
3.47663e-13	6.17751e-13	2.62052e-12
3.47663e-13	7.15411e-13	2.66934e-12
2.98833e-13	9.10721e-13	2.81583e-12
2.50003e-13	1.0572e-12	2.91349e-12
1.52353e-13	1.25252e-12	3.01114e-12
5.46927e-14	1.49666e-12	3.05997e-12
5.86271e-15	1.69197e-12	3.1088e-12
-4.29573e-14	1.83845e-12	3.1088e-12
-9.17873e-14	1.98494e-12	3.1088e-12
-1.40617e-13	2.03376e-12	3.1088e-12
-1.89447e-13	2.08259e-12	3.1088e-12
-1.40617e-13	2.03376e-12	3.1088e-12
-1.89447e-13	1.93611e-12	3.1088e-12
-1.40617e-13	1.78963e-12	3.1088e-12
-1.40617e-13	1.59431e-12	3.05997e-12
-1.40617e-13	1.35017e-12	3.05997e-12
-9.17873e-14	1.10603e-12	3.01114e-12
-4.29573e-14	8.13061e-13	2.96231e-12
-9.17873e-14	5.68921e-13	2.86466e-12
-4.29573e-14	3.24781e-13	2.767e-12
-4.29573e-14	8.06409e-14	2.62052e-12
-4.29573e-14	-1.63499e-13	2.4252e-12
-4.29573e-14	-2.61149e-13	2.13224e-12
-4.29573e-14	-3.09979e-13	1.8881e-12
-9.17873e-14	-3.09979e-13	1.5463e-12
-4.29573e-14	-2.12329e-13	1.2045e-12
-9.17873e-14	-1.14669e-13	8.13883e-13
-1.40617e-13	8.06409e-14	5.20913e-13
-1.40617e-13	2.27131e-13	2.76773e-13
-1.89447e-13	4.71271e-13	8.14634e-14
-1.89447e-13	6.17751e-13	-1.13857e-13
-1.89447e-13	7.15411e-13	-2.11507e-13
-2.38277e-13	7.64241e-13	-3.09167e-13
-2.38277e-13	7.15411e-13	-4.06827e-13
-2.87097e-13	5.20101e-13	-5.04477e-13
-2.87097e-13	3.24781e-13	-5.53307e-13
-3.35927e-13	8.06409e-14	-6.02137e-13
-3.35927e-13	-1.63499e-13	-6.50967e-13
-3.84757e-13	-3.58809e-13	-6.02137e-13
-3.35927e-13	-5.05289e-13	-6.02137e-13
-2.87097e-13	-6.02949e-13	-5.04477e-13
-2.38277e-13	-6.51779e-13	-4.06827e-13
-1.40617e-13	-7.00609e-13	-2.60337e-13
-9.17873e-14	-7.00609e-13	-6.50266e-14
5.86271e-15	-7.00609e-13	1.30283e-13
5.46927e-14	-6.51779e-13	3.25603e-13
1.52353e-13	-5.05289e-13	5.20913e-13
2.50003e-13	-2.61149e-13	7.65053e-13
2.98833e-13	-6.58391e-14	9.11533e-13
2.98833e-13	2.27131e-13	1.15567e-12
3.47663e-13	3.73611e-13	1.35099e-12
2.98833e-13	5.68921e-13	1.49747e-12
2.98833e-13	7.15411e-13	1.59513e-12
2.50003e-13	8.61891e-13	1.69278e-12
1.52353e-13	9.59551e-13	1.74161e-12
5.46927e-14	1.0572e-12	1.79044e-12
-4.29573e-14	1.00838e-12	1.79044e-12
-1.89447e-13	1.00838e-12	1.83927e-12
-3.35927e-13	9.10721e-13	1.8881e-12
-4.82417e-13	8.13061e-13	1.93692e-12
-6.28897e-13	7.64241e-13	1.98575e-12
-8.24207e-13	6.17751e-13	2.08341e-12
-9.21867e-13	5.68921e-13	2.13224e-12
-9.70697e-13	5.20101e-13	2.22989e-12
-1.01953e-12	5.20101e-13	2.32755e-12
-1.01953e-12	5.68921e-13	2.47403e-12
-9.21867e-13	6.17751e-13	2.57169e-12
-8.73037e-13	7.15411e-13	2.71817e-12
-6.77727e-13	7.64241e-13	2.767e-12
-4.82417e-13	8.13061e-13	2.767e-12
-2.87097e-13	8.13061e-13	2.767e-12
-1.40617e-13	9.10721e-13	2.767e-12
5.86271e-15	1.00838e-12	2.62052e-12
1.52353e-13	1.15486e-12	2.47403e-12
2.01183e-13	1.30135e-12	2.32755e-12
2.50003e-13	1.49666e-12	2.13224e-12
2.50003e-13	1.64314e-12	2.03458e-12
2.50003e-13	1.78963e-12	1.83927e-12
2.01183e-13	1.83845e-12	1.74161e-12
1.52353e-13	1.93611e-12	1.64395e-12
1.52353e-13	1.88728e-12	1.5463e-12
1.03523e-13	1.83845e-12	1.5463e-12
1.03523e-13	1.69197e-12	1.49747e-12
5.46927e-14	1.59431e-12	1.44864e-12
5.46927e-14	1.49666e-12	1.44864e-12
1.03523e-13	1.399e-12	1.35099e-12
1.03523e-13	1.25252e-12	1.35099e-12
1.03523e-13	1.0572e-12	1.25333e-12
1.03523e-13	8.61891e-13	1.2045e-12
5.46927e-14	6.17751e-13	1.10685e-12
5.46927e-14	3.24781e-13	1.05802e-12
5.86271e-15	8.06409e-14	9.60363e-13
-4.29573e-14	-2.12329e-13	9.11533e-13
5.86271e-15	-5.05289e-13	8.62713e-13
-4.29573e-14	-7.00609e-13	8.62713e-13
-4.29573e-14	-9.44749e-13	9.11533e-13
-4.29573e-14	-1.14006e-12	1.00919e-12
-4.29573e-14	-1.28654e-12	1.10685e-12
-4.29573e-14	-1.43303e-12	1.25333e-12
-4.29573e-14	-1.48186e-12	1.39981e-12
-4.29573e-14	-1.48186e-12	1.49747e-12
-4.29573e-14	-1.43303e-12	1.5463e-12
-4.29573e-14	-1.43303e-12	1.69278e-12
5.86271e-15	-1.33537e-12	1.69278e-12
1.03523e-13	-1.23772e-12	1.74161e-12
2.01183e-13	-1.23772e-12	1.69278e-12
2.50003e-13	-1.18889e-12	1.74161e-12
3.47663e-13	-1.23772e-12	1.69278e-12
3.47663e-13	-1.23772e-12	1.69278e-12
3.47663e-13	-1.33537e-12	1.64395e-12
3.47663e-13	-1.3842e-12	1.69278e-12
2.98833e-13	-1.53068e-12	1.69278e-12
2.01183e-13	-1.62834e-12	1.74161e-12
2.01183e-13	-1.77482e-12	1.83927e-12
1.52353e-13	-1.97014e-12	1.8881e-12
1.52353e-13	-2.21428e-12	1.93692e-12
5.86271e-15	-2.50725e-12	1.93692e-12
-4.29573e-14	-2.89787e-12	1.83927e-12
-1.40617e-13	-3.2885e-12	1.74161e-12
-3.35927e-13	-3.8256e-12	1.59513e-12
-4.82417e-13	-3.8256e-12	1.39981e-12
-6.28897e-13	-3.43498e-12	1.2045e-12
-6.77727e-13	-3.09318e-12	1.05802e-12
-7.75387e-13	-2.75139e-12	8.62713e-13
-7.75387e-13	-2.45842e-12	6.67393e-13
-7.75387e-13	-2.16545e-12	5.20913e-13
-7.75387e-13	-1.82365e-12	4.23253e-13
-6.77727e-13	-1.48186e-12	3.74423e-13
-6.28897e-13	-1.28654e-12	3.74423e-13
-4.82417e-13	-9.93579e-13	4.72083e-13
-4.33587e-13	-7.98259e-13	6.18563e-13
-3.84757e-13	-6.02949e-13	8.13883e-13
-3.35927e-13	-4.56469e-13	1.00919e-12
-2.87097e-13	-3.09979e-13	1.2045e-12
-2.87097e-13	-2.12329e-13	1.39981e-12
-2.38277e-13	-1.63499e-13	1.59513e-12
-2.38277e-13	-1.14669e-13	1.79044e-12
-1.89447e-13	-1.14669e-13	2.03458e-12
-1.40617e-13	-1.14669e-13	2.22989e-12
-9.17873e-14	-1.63499e-13	2.47403e-12
-9.17873e-14	-2.12329e-13	2.66934e-12
-4.29573e-14	-2.61149e-13	2.91349e-12
5.86271e-15	-2.12329e-13	3.1088e-12
5.86271e-15	-1.63499e-13	3.25528e-12
5.86271e-15	-1.70091e-14	3.35294e-12
5.46927e-14	1.29471e-13	3.35294e-12
5.86271e-15	2.75961e-13	3.25528e-12
5.86271e-15	4.71271e-13	3.1088e-12
5.86271e-15	7.15411e-13	2.91349e-12
-4.29573e-14	9.10721e-13	2.71817e-12
-9.17873e-14	1.0572e-12	2.37638e-12
-1.40617e-13	1.20369e-12	2.08341e-12
-1.40617e-13	1.20369e-12	1.69278e-12
-2.38277e-13	1.20369e-12	1.30216e-12
-2.38277e-13	1.15486e-12	8.62713e-13
-3.84757e-13	1.10603e-12	5.20913e-13
-4.33587e-13	1.0572e-12	1.30283e-13
-5.31237e-13	1.15486e-12	-1.62677e-13
-5.80067e-13	1.25252e-12	-4.06827e-13
-6.77727e-13	1.399e-12	-5.53307e-13
-7.26557e-13	1.49666e-12	-6.99787e-13
-8.73037e-13	1.54548e-12	-7.97447e-13
-9.21867e-13	1.44783e-12	-8.46277e-13
-1.06835e-12	1.20369e-12	-8.95107e-13
-1.11718e-12	8.61891e-13	-8.95107e-13
-1.21484e-12	4.71271e-13	-8.95107e-13
-1.26367e-12	3.18109e-14	-8.95107e-13
-1.26367e-12	-4.56469e-13	-8.46277e-13
-1.21484e-12	-8.95919e-13	-7.97447e-13
-1.11718e-12	-1.3842e-12	-7.48617e-13
-9.70697e-13	-1.77482e-12	-6.50967e-13
-8.73037e-13	-2.11662e-12	-6.50967e-13
-6.77727e-13	-2.40959e-12	-5.53307e-13
-5.80067e-13	-2.6049e-12	-5.04477e-13
-4.33587e-13	-2.80021e-12	-4.55647e-13
-3.35927e-13	-2.89787e-12	-3.57997e-13
-2.38277e-13	-2.99553e-12	-3.09167e-13
-9.17873e-14	-2.9467e-12	-2.60337e-13
-4.29573e-14	-2.80021e-12	-2.60337e-13
5.46927e-14	-2.55607e-12	-2.60337e-13
1.03523e-13	-2.31193e-12	-3.57997e-13
1.52353e-13	-2.01896e-12	-4.06827e-13
1.52353e-13	-1.62834e-12	-4.55647e-13
2.01183e-13	-1.33537e-12	-5.53307e-13
1.52353e-13	-1.0424e-12	-5.53307e-13
1.03523e-13	-7.98259e-13	-5.53307e-13
-4.29573e-14	-7.00609e-13	-5.04477e-13
-9.17873e-14	-5.54119e-13	-4.06827e-13
-1.89447e-13	-5.54119e-13	-3.09167e-13
-2.87097e-13	-5.54119e-13	-1.13857e-13
-2.87097e-13	-5.54119e-13	-1.61966e-14
-3.35927e-13	-6.51779e-13	1.30283e-13
-3.84757e-13	-7.49439e-13	2.76773e-13
-3.84757e-13	-7.98259e-13	3.74423e-13
-3.84757e-13	-8.47089e-13	5.20913e-13
-3.35927e-13	-8.47089e-13	7.16223e-13
-3.35927e-13	-7.98259e-13	8.62713e-13
-2.38277e-13	-7.00609e-13	1.05802e-12
-1.89447e-13	-6.51779e-13	1.25333e-12
-1.40617e-13	-5.05289e-13	1.44864e-12
-1.40617e-13	-3.58809e-13	1.5463e-12
-2.38277e-13	-2.61149e-13	1.69278e-12
-2.38277e-13	-1.14669e-13	1.83927e-12
-2.87097e-13	8.06409e-14	1.93692e-12
-3.84757e-13	2.27131e-13	2.08341e-12
-4.82417e-13	4.22441e-13	2.13224e-12
-5.31237e-13	6.66581e-13	2.27872e-12
-6.28897e-13	9.59551e-13	2.37638e-12
-6.77727e-13	1.25252e-12	2.4252e-12
-7.26557e-13	1.54548e-12	2.47403e-12
-7.75387e-13	1.7408e-12	2.52286e-12
-8.24207e-13	1.88728e-12	2.57169e-12
-8.73037e-13	2.03376e-12	2.62052e-12
-9.21867e-13	2.08259e-12	2.62052e-12
-9.70697e-13	2.13142e-12	2.57169e-12
-9.70697e-13	2.18025e-12	2.57169e-12
-9.70697e-13	2.22908e-12	2.57169e-12
-9.70697e-13	2.32674e-12	2.52286e-12
-9.21867e-13	2.37556e-12	2.57169e-12
-9.21867e-13	2.42439e-12	2.57169e-12
-8.24207e-13	2.47322e-12	2.66934e-12
-8.24207e-13	2.42439e-12	2.767e-12
-7.75387e-13	2.42439e-12	2.86466e-12
-6.77727e-13	2.37556e-12	2.91349e-12
-6.28897e-13	2.32674e-12	2.91349e-12
-5.80067e-13	2.18025e-12	2.96231e-12
-5.31237e-13	2.03376e-12	2.91349e-12
-4.33587e-13	1.78963e-12	2.81583e-12
-4.33587e-13	1.54548e-12	2.71817e-12
-3.35927e-13	1.30135e-12	2.57169e-12
-2.87097e-13	1.10603e-12	2.4252e-12
-2.38277e-13	9.10721e-13	2.27872e-12
-1.89447e-13	7.15411e-13	2.13224e-12
-1.40617e-13	5.68921e-13	2.08341e-12
-1.40617e-13	4.22441e-13	2.03458e-12
-1.89447e-13	2.27131e-13	1.98575e-12
-2.38277e-13	1.78301e-13	1.98575e-12
-3.35927e-13	1.29471e-13	1.93692e-12
-4.33587e-13	2.27131e-13	1.93692e-12
-4.82417e-13	2.75961e-13	1.8881e-12
-5.31237e-13	4.22441e-13	1.83927e-12
-5.80067e-13	5.20101e-13	1.83927e-12
-5.80067e-13	7.15411e-13	1.83927e-12
-6.28897e-13	8.13061e-13	1.79044e-12
-5.31237e-13	8.61891e-13	1.74161e-12
-3.84757e-13	9.10721e-13	1.64395e-12
-2.38277e-13	9.10721e-13	1.44864e-12
-9.17873e-14	8.61891e-13	1.25333e-12
5.46927e-14	9.10721e-13	9.60363e-13
1.52353e-13	9.10721e-13	6.67393e-13
2.50003e-13	9.59551e-13	2.76773e-13
2.98833e-13	1.00838e-12	-6.50266e-14
3.47663e-13	1.0572e-12	-4.06827e-13
3.47663e-13	1.0572e-12	-7.48617e-13
3.96493e-13	1.0572e-12	-1.04159e-12
4.45323e-13	1.0572e-12	-1.33456e-12
4.45323e-13	1.0572e-12	-1.62753e-12
3.96493e-13	1.0572e-12	-1.9205e-12
3.96493e-13	1.00838e-12	-2.21346e-12
3.47663e-13	9.59551e-13	-2.40878e-12
2.98833e-13	9.10721e-13	-2.65292e-12
1.52353e-13	7.64241e-13	-2.84823e-12
5.46927e-14	6.66581e-13	-3.04354e-12
-9.17873e-14	5.68921e-13	-3.19002e-12
-2.87097e-13	4.22441e-13	-3.28768e-12
-4.33587e-13	2.75961e-13	-3.33651e-12
-6.28897e-13	1.78301e-13	-3.38534e-12
-7.75387e-13	8.06409e-14	-3.38534e-12
-9.70697e-13	3.18109e-14	-3.28768e-12
-1.11718e-12	3.18109e-14	-3.23885e-12
-1.21484e-12	1.29471e-13	-3.1412e-12
-1.31249e-12	2.75961e-13	-3.09237e-12
-1.31249e-12	4.22441e-13	-2.99471e-12
-1.31249e-12	6.17751e-13	-2.89706e-12
-1.26367e-12	8.13061e-13	-2.89706e-12
-1.11718e-12	1.0572e-12	-2.89706e-12
-9.70697e-13	1.25252e-12	-2.84823e-12
-8.73037e-13	1.49666e-12	-2.84823e-12
-7.75387e-13	1.7408e-12	-2.89706e-12
-6.77727e-13	1.98494e-12	-2.84823e-12
-5.31237e-13	2.22908e-12	-2.84823e-12
-4.82417e-13	2.37556e-12	-2.84823e-12
-3.84757e-13	2.47322e-12	-2.89706e-12
-3.35927e-13	2.47322e-12	-2.94588e-12
-2.38277e-13	2.37556e-12	-3.04354e-12
-1.40617e-13	2.32674e-12	-3.09237e-12
-9.17873e-14	2.27791e-12	-3.19002e-12
-4.29573e-14	2.22908e-12	-3.28768e-12
5.86271e-15	2.22908e-12	-3.28768e-12
5.46927e-14	2.22908e-12	-3.23885e-12
5.46927e-14	2.32674e-12	-3.09237e-12
5.86271e-15	2.42439e-12	-2.89706e-12
5.86271e-15	2.52205e-12	-2.70174e-12
-9.17873e-14	2.52205e-12	-2.4576e-12
-9.17873e-14	2.47322e-12	-2.21346e-12
-1.40617e-13	2.47322e-12	-1.9205e-12
-1.89447e-13	2.42439e-12	-1.62753e-12
-2.38277e-13	2.37556e-12	-1.38339e-12
-2.38277e-13	2.32674e-12	-1.09042e-12
-2.87097e-13	2.18025e-12	-7.97447e-13
-2.87097e-13	2.03376e-12	-5.04477e-13
-3.84757e-13	1.88728e-12	-2.11507e-13
-4.33587e-13	1.59431e-12	1.30283e-13
-4.82417e-13	1.399e-12	4.72083e-13
-5.31237e-13	1.10603e-12	7.65053e-13
-6.28897e-13	8.61891e-13	1.00919e-12
-6.28897e-13	5.68921e-13	1.15567e-12
-7.26557e-13	3.24781e-13	1.25333e-12
-6.77727e-13	3.18109e-14	1.25333e-12
-6.77727e-13	-3.09979e-13	1.2045e-12
-6.28897e-13	-6.02949e-13	1.05802e-12
-4.82417e-13	-9.93579e-13	9.11533e-13
-2.38277e-13	-1.33537e-12	6.67393e-13
5.46927e-14	-1.62834e-12	4.72083e-13
3.47663e-13	-1.92131e-12	1.79113e-13
6.40633e-13	-2.21428e-12	-6.50266e-14
8.84773e-13	-2.26311e-12	-3.57997e-13
1.08008e-12	-2.21428e-12	-5.53307e-13
1.22657e-12	-2.11662e-12	-7.97447e-13
1.32422e-12	-1.87248e-12	-9.43927e-13
1.37305e-12	-1.62834e-12	-1.04159e-12
1.37305e-12	-1.33537e-12	-1.09042e-12
1.37305e-12	-1.09123e-12	-1.09042e-12
1.32422e-12	-8.95919e-13	-1.09042e-12
1.22657e-12	-7.98259e-13	-1.04159e-12
1.08008e-12	-7.00609e-13	-9.92757e-13
9.33603e-13	-6.51779e-13	-9.43927e-13
7.87113e-13	-6.51779e-13	-8.95107e-13
6.40633e-13	-6.02949e-13	-8.95107e-13
5.42973e-13	-5.05289e-13	-8.95107e-13
4.45323e-13	-4.56469e-13	-9.43927e-13
3.47663e-13	-3.58809e-13	-9.92757e-13
2.50003e-13	-3.09979e-13	-1.04159e-12
2.01183e-13	-2.61149e-13	-1.13924e-12
1.52353e-13	-2.12329e-13	-1.13924e-12
1.52353e-13	-2.12329e-13	-1.2369e-12
2.01183e-13	-2.61149e-13	-1.2369e-12
2.50003e-13	-3.58809e-13	-1.28573e-12
3.47663e-13	-4.56469e-13	-1.28573e-12
4.94153e-13	-6.02949e-13	-1.33456e-12
5.91803e-13	-8.47089e-13	-1.33456e-12
7.38293e-13	-1.0424e-12	-1.28573e-12
8.84773e-13	-1.33537e-12	-1.2369e-12
1.03125e-12	-1.62834e-12	-1.2369e-12
1.12891e-12	-1.92131e-12	-1.18807e-12
1.17774e-12	-2.11662e-12	-1.18807e-12
1.22657e-12	-2.26311e-12	-1.13924e-12
1.17774e-12	-2.36076e-12	-1.18807e-12
1.12891e-12	-2.50725e-12	-1.2369e-12
1.08008e-12	-2.6049e-12	-1.18807e-12
9.33603e-13	-2.75139e-12	-1.18807e-12
8.35943e-13	-2.84904e-12	-1.18807e-12
6.89463e-13	-3.09318e-12	-1.13924e-12
5.42973e-13	-3.38615e-12	-1.13924e-12
4.45323e-13	-3.72795e-12	-1.09042e-12
3.47663e-13	-4.02092e-12	-1.04159e-12
2.01183e-13	-4.36271e-12	-1.04159e-12
1.52353e-13	-4.65568e-12	-1.04159e-12
5.46927e-14	-4.89982e-12	-1.04159e-12
5.46927e-14	-4.99748e-12	-1.04159e-12
5.46927e-14	-4.99748e-12	-1.09042e-12
1.03523e-13	-4.85099e-12	-1.13924e-12
2.01183e-13	-4.65568e-12	-1.18807e-12
2.50003e-13	-4.41154e-12	-1.28573e-12
2.50003e-13	-4.06974e-12	-1.38339e-12
2.98833e-13	-3.67912e-12	-1.43222e-12
2.98833e-13	-3.2885e-12	-1.48104e-12
2.98833e-13	-2.89787e-12	-1.48104e-12
2.98833e-13	-2.40959e-12	-1.48104e-12
2.50003e-13	-2.01896e-12	-1.43222e-12
2.50003e-13	-1.57951e-12	-1.38339e-12
2.01183e-13	-1.14006e-12	-1.28573e-12
2.01183e-13	-7.98259e-13	-1.2369e-12
2.50003e-13	-5.05289e-13	-1.09042e-12
2.98833e-13	-3.09979e-13	-9.43927e-13
2.98833e-13	-2.12329e-13	-7.48617e-13
2.98833e-13	-2.12329e-13	-5.53307e-13
2.98833e-13	-2.12329e-13	-3.57997e-13
2.98833e-13	-2.61149e-13	-1.13857e-13
2.50003e-13	-2.61149e-13	1.79113e-13
2.98833e-13	-2.61149e-13	4.23253e-13
2.98833e-13	-2.61149e-13	6.18563e-13
3.47663e-13	-2.61149e-13	7.65053e-13
3.47663e-13	-1.63499e-13	9.11533e-13
3.96493e-13	-6.58391e-14	1.00919e-12
4.45323e-13	1.29471e-13	9.60363e-13
3.96493e-13	3.24781e-13	9.11533e-13
3.47663e-13	5.68921e-13	8.62713e-13
2.01183e-13	8.13061e-13	7.16223e-13
1.03523e-13	1.15486e-12	6.18563e-13
-4.29573e-14	1.44783e-12	4.72083e-13
-1.89447e-13	1.69197e-12	3.74423e-13
-2.38277e-13	1.88728e-12	3.25603e-13
-3.35927e-13	2.13142e-12	2.76773e-13
-3.84757e-13	2.27791e-12	2.76773e-13
-4.33587e-13	2.42439e-12	3.25603e-13
-4.33587e-13	2.47322e-12	3.74423e-13
-3.84757e-13	2.52205e-12	5.20913e-13
-3.35927e-13	2.47322e-12	6.18563e-13
-2.87097e-13	2.37556e-12	6.67393e-13
-1.89447e-13	2.27791e-12	7.16223e-13
-1.40617e-13	2.13142e-12	7.65053e-13
-4.29573e-14	1.98494e-12	7.65053e-13
5.86271e-15	1.83845e-12	7.65053e-13
5.46927e-14	1.69197e-12	6.67393e-13
1.03523e-13	1.54548e-12	5.69743e-13
2.01183e-13	1.49666e-12	4.72083e-13
2.50003e-13	1.399e-12	3.25603e-13
2.98833e-13	1.35017e-12	2.76773e-13
3.47663e-13	1.30135e-12	2.27943e-13
3.96493e-13	1.25252e-12	2.27943e-13
3.96493e-13	1.20369e-12	2.76773e-13
4.45323e-13	1.15486e-12	3.25603e-13
4.45323e-13	1.10603e-12	4.23253e-13
4.45323e-13	1.10603e-12	5.20913e-13
3.96493e-13	1.15486e-12	5.69743e-13
3.96493e-13	1.20369e-12	6.67393e-13
2.98833e-13	1.20369e-12	6.67393e-13
2.98833e-13	1.20369e-12	7.65053e-13
2.50003e-13	1.20369e-12	8.62713e-13
2.01183e-13	1.10603e-12	9.11533e-13
2.01183e-13	9.59551e-13	1.05802e-12
2.50003e-13	7.15411e-13	1.15567e-12
2.50003e-13	4.71271e-13	1.25333e-12
2.98833e-13	1.78301e-13	1.35099e-12
2.98833e-13	-6.58391e-14	1.39981e-12
2.98833e-13	-3.09979e-13	1.44864e-12
2.50003e-13	-5.05289e-13	1.44864e-12
2.01183e-13	-6.51779e-13	1.35099e-12
1.52353e-13	-8.47089e-13	1.25333e-12
1.03523e-13	-1.0424e-12	1.10685e-12
5.46927e-14	-1.23772e-12	9.11533e-13
5.46927e-14	-1.43303e-12	6.67393e-13
5.86271e-15	-1.57951e-12	4.72083e-13
5.86271e-15	-1.726e-12	2.27943e-13
5.86271e-15	-1.82365e-12	8.14634e-14
5.46927e-14	-1.82365e-12	-6.50266e-14
1.03523e-13	-1.82365e-12	-1.13857e-13
1.03523e-13	-1.726e-12	-1.62677e-13
1.03523e-13	-1.62834e-12	-2.60337e-13
1.03523e-13	-1.48186e-12	-2.60337e-13
1.03523e-13	-1.3842e-12	-2.11507e-13
5.46927e-14	-1.23772e-12	-2.11507e-13
5.46927e-14	-1.0424e-12	-1.62677e-13
5.46927e-14	-8.47089e-13	-1.62677e-13
5.86271e-15	-7.00609e-13	-2.11507e-13
-4.29573e-14	-5.05289e-13	-2.11507e-13
-9.17873e-14	-3.58809e-13	-2.60337e-13
-1.40617e-13	-1.63499e-13	-3.09167e-13
-2.38277e-13	8.06409e-14	-3.57997e-13
-3.35927e-13	1.78301e-13	-3.57997e-13
-4.82417e-13	2.75961e-13	-4.06827e-13
-5.80067e-13	3.24781e-13	-5.53307e-13
-7.75387e-13	3.24781e-13	-7.48617e-13
-9.21867e-13	3.73611e-13	-9.92757e-13
-1.06835e-12	3.24781e-13	-1.38339e-12
-1.16601e-12	2.75961e-13	-1.82284e-12
-1.21484e-12	1.78301e-13	-3.09237e-12
-1.26367e-12	8.06409e-14	-3.43417e-12
-1.21484e-12	3.18109e-14	-3.38534e-12
-1.21484e-12	-6.58391e-14	-3.33651e-12
-1.16601e-12	-1.63499e-13	-3.33651e-12
-1.06835e-12	-2.12329e-13	-3.43417e-12
-1.01953e-12	-2.61149e-13	-3.48299e-12
-8.73037e-13	-2.61149e-13	-3.53182e-12
-8.24207e-13	-2.61149e-13	-3.53182e-12
-8.24207e-13	-2.61149e-13	-3.48299e-12
-8.24207e-13	-2.12329e-13	-3.43417e-12
-8.73037e-13	-1.63499e-13	-3.28768e-12
-9.70697e-13	-1.63499e-13	-3.09237e-12
-1.11718e-12	-1.63499e-13	-2.89706e-12
-1.21484e-12	-2.61149e-13	-2.65292e-12
-1.36132e-12	-4.07639e-13	-2.4576e-12
-1.45898e-12	-6.02949e-13	-2.26229e-12
-1.55663e-12	-7.98259e-13	-2.06698e-12
-1.60546e-12	-1.0424e-12	-1.87167e-12
-1.60546e-12	-1.28654e-12	-1.72518e-12
-1.55663e-12	-1.48186e-12	-1.62753e-12
-1.5078e-12	-1.62834e-12	-1.48104e-12
-1.36132e-12	-1.726e-12	-1.38339e-12
-1.16601e-12	-1.87248e-12	-1.28573e-12
-8.73037e-13	-1.92131e-12	-1.2369e-12
-6.28897e-13	-1.97014e-12	-1.09042e-12
-3.84757e-13	-1.97014e-12	-9.92757e-13
-1.89447e-13	-1.92131e-12	-8.46277e-13
5.86271e-15	-1.87248e-12	-6.99787e-13
1.52353e-13	-1.726e-12	-5.53307e-13
2.01183e-13	-1.57951e-12	-4.55647e-13
2.01183e-13	-1.33537e-12	-3.57997e-13
1.52353e-13	-1.0424e-12	-2.60337e-13
1.03523e-13	-7.00609e-13	-2.11507e-13
5.46927e-14	-4.07639e-13	-1.62677e-13
-4.29573e-14	-1.70091e-14	-2.11507e-13
-9.17873e-14	2.75961e-13	-2.60337e-13
-1.40617e-13	5.68921e-13	-4.06827e-13
-1.89447e-13	8.13061e-13	-5.53307e-13
-1.89447e-13	9.59551e-13	-6.99787e-13
-2.38277e-13	1.00838e-12	-7.97447e-13
-2.38277e-13	9.59551e-13	-8.95107e-13
-1.89447e-13	8.61891e-13	-9.43927e-13
-9.17873e-14	6.66581e-13	-1.04159e-12
5.86271e-15	4.22441e-13	-1.04159e-12
1.03523e-13	1.78301e-13	-1.04159e-12
2.50003e-13	-6.58391e-14	-1.04159e-12
4.45323e-13	-3.09979e-13	-1.09042e-12
5.91803e-13	-4.56469e-13	-1.09042e-12
6.89463e-13	-5.54119e-13	-1.13924e-12
7.38293e-13	-6.02949e-13	-1.18807e-12
7.87113e-13	-6.51779e-13	-1.13924e-12
7.38293e-13	-7.00609e-13	-1.13924e-12
6.89463e-13	-6.51779e-13	-1.13924e-12
5.42973e-13	-6.02949e-13	-1.09042e-12
3.47663e-13	-6.02949e-13	-1.09042e-12
2.01183e-13	-5.54119e-13	-1.13924e-12
5.86271e-15	-5.05289e-13	-1.28573e-12
-9.17873e-14	-4.56469e-13	-1.43222e-12
-1.89447e-13	-3.58809e-13	-1.67635e-12
-2.87097e-13	-3.09979e-13	-1.9205e-12
-3.84757e-13	-2.12329e-13	-2.06698e-12
-3.84757e-13	-1.14669e-13	-2.26229e-12
-3.84757e-13	3.18109e-14	-2.40878e-12
-3.84757e-13	1.78301e-13	-2.50643e-12
-3.84757e-13	2.75961e-13	-2.55526e-12
-3.35927e-13	4.22441e-13	-2.50643e-12
-2.87097e-13	5.20101e-13	-2.40878e-12
-2.38277e-13	6.66581e-13	-2.26229e-12
-1.40617e-13	7.64241e-13	-2.01815e-12
-4.29573e-14	8.61891e-13	-1.77401e-12
1.03523e-13	9.10721e-13	-1.52987e-12
2.01183e-13	1.00838e-12	-1.2369e-12
3.96493e-13	1.10603e-12	-9.92757e-13
6.40633e-13	1.15486e-12	-6.99787e-13
8.84773e-13	1.30135e-12	-5.04477e-13
1.12891e-12	1.30135e-12	-3.09167e-13
1.32422e-12	1.35017e-12	-1.62677e-13
1.56836e-12	1.399e-12	-6.50266e-14
1.76368e-12	1.399e-12	-6.50266e-14
1.91016e-12	1.44783e-12	-1.61966e-14
2.05664e-12	1.54548e-12	-1.13857e-13
2.20313e-12	1.64314e-12	-2.11507e-13
2.25196e-12	1.69197e-12	-3.09167e-13
2.30078e-12	1.83845e-12	-4.55647e-13
2.30078e-12	1.88728e-12	-5.04477e-13
2.30078e-12	1.93611e-12	-6.02137e-13
2.25196e-12	1.93611e-12	-6.02137e-13
2.1543e-12	1.93611e-12	-6.50967e-13
2.05664e-12	1.83845e-12	-6.50967e-13
1.91016e-12	1.7408e-12	-6.50967e-13
1.8125e-12	1.64314e-12	-5.53307e-13
1.66602e-12	1.44783e-12	-4.55647e-13
1.56836e-12	1.25252e-12	-3.09167e-13
1.47071e-12	1.0572e-12	-2.11507e-13
1.37305e-12	7.64241e-13	-1.61966e-14
1.22657e-12	5.20101e-13	1.30283e-13
1.12891e-12	2.27131e-13	3.25603e-13
9.33603e-13	-1.14669e-13	5.20913e-13
7.87113e-13	-4.56469e-13	7.16223e-13
5.91803e-13	-7.49439e-13	9.11533e-13
4.94153e-13	-9.93579e-13	1.15567e-12
2.98833e-13	-1.09123e-12	1.35099e-12
2.01183e-13	-1.14006e-12	1.49747e-12
1.03523e-13	-1.14006e-12	1.59513e-12
1.03523e-13	-1.14006e-12	1.64395e-12
5.46927e-14	-1.09123e-12	1.59513e-12
1.03523e-13	-9.93579e-13	1.5463e-12
5.46927e-14	-9.44749e-13	1.39981e-12
1.03523e-13	-8.95919e-13	1.25333e-12
1.03523e-13	-8.47089e-13	1.05802e-12
1.03523e-13	-7.49439e-13	8.62713e-13
1.03523e-13	-7.00609e-13	7.65053e-13
1.52353e-13	-7.00609e-13	5.69743e-13
1.52353e-13	-7.49439e-13	4.23253e-13
2.50003e-13	-7.98259e-13	2.27943e-13
2.50003e-13	-8.47089e-13	-1.61966e-14
2.98833e-13	-8.47089e-13	-2.60337e-13
2.50003e-13	-8.95919e-13	-5.04477e-13
2.01183e-13	-8.95919e-13	-6.99787e-13
1.03523e-13	-9.44749e-13	-8.95107e-13
5.86271e-15	-9.93579e-13	-1.09042e-12
-1.89447e-13	-1.09123e-12	-1.2369e-12
-3.35927e-13	-1.28654e-12	-1.38339e-12
-4.82417e-13	-1.43303e-12	-1.48104e-12
-6.28897e-13	-1.62834e-12	-1.5787e-12
-7.75387e-13	-1.82365e-12	-1.67635e-12
-8.24207e-13	-1.97014e-12	-1.72518e-12
-9.70697e-13	-2.16545e-12	-1.82284e-12
-1.06835e-12	-2.26311e-12	-1.9205e-12
-1.11718e-12	-2.36076e-12	-2.01815e-12
-1.11718e-12	-2.36076e-12	-2.06698e-12
-1.06835e-12	-2.31193e-12	-2.16463e-12
-1.01953e-12	-2.26311e-12	-2.21346e-12
-9.70697e-13	-2.21428e-12	-2.26229e-12
-9.21867e-13	-2.11662e-12	-2.26229e-12
-8.24207e-13	-2.06779e-12	-2.21346e-12
-6.77727e-13	-1.97014e-12	-2.16463e-12
-5.80067e-13	-1.92131e-12	-2.11581e-12
-4.33587e-13	-1.82365e-12	-2.01815e-12
-3.35927e-13	-1.726e-12	-1.9205e-12
-2.38277e-13	-1.67717e-12	-1.87167e-12
-1.89447e-13	-1.62834e-12	-1.77401e-12
-1.40617e-13	-1.48186e-12	-1.77401e-12
-1.40617e-13	-1.43303e-12	-1.72518e-12
-9.17873e-14	-1.33537e-12	-1.67635e-12
-9.17873e-14	-1.23772e-12	-1.62753e-12
-9.17873e-14	-1.14006e-12	-1.5787e-12
-9.17873e-14	-1.0424e-12	-1.52987e-12
-9.17873e-14	-9.93579e-13	-1.48104e-12
-1.40617e-13	-9.93579e-13	-1.48104e-12
-2.38277e-13	-9.93579e-13	-1.48104e-12
-2.87097e-13	-9.44749e-13	-1.48104e-12
-3.35927e-13	-9.93579e-13	-1.48104e-12
-4.33587e-13	-9.93579e-13	-1.43222e-12
-5.31237e-13	-9.93579e-13	-1.38339e-12
-5.80067e-13	-9.44749e-13	-1.38339e-12
-6.28897e-13	-8.95919e-13	-1.28573e-12
-6.28897e-13	-8.47089e-13	-1.2369e-12
-5.80067e-13	-7.49439e-13	-1.18807e-12
-5.31237e-13	-5.54119e-13	-1.04159e-12
-4.33587e-13	-3.58809e-13	-8.95107e-13
-2.87097e-13	-2.12329e-13	-6.99787e-13
-1.40617e-13	-6.58391e-14	-5.53307e-13
-4.29573e-14	1.29471e-13	-4.06827e-13
5.46927e-14	2.27131e-13	-3.57997e-13
1.52353e-13	3.24781e-13	-2.60337e-13
2.50003e-13	3.73611e-13	-2.60337e-13
2.50003e-13	3.73611e-13	-2.60337e-13
2.50003e-13	2.75961e-13	-2.60337e-13
2.98833e-13	1.78301e-13	-3.57997e-13
2.98833e-13	-1.70091e-14	-4.06827e-13
2.98833e-13	-3.09979e-13	-4.55647e-13
2.50003e-13	-6.02949e-13	-5.04477e-13
2.50003e-13	-9.44749e-13	-6.02137e-13
1.03523e-13	-1.28654e-12	-7.48617e-13
5.86271e-15	-1.57951e-12	-8.46277e-13
-9.17873e-14	-1.87248e-12	-9.43927e-13
-1.40617e-13	-2.11662e-12	-1.09042e-12
-2.87097e-13	-2.21428e-12	-1.18807e-12
-3.35927e-13	-2.26311e-12	-1.2369e-12
-4.82417e-13	-2.26311e-12	-1.2369e-12
-5.31237e-13	-2.21428e-12	-1.2369e-12
-6.77727e-13	-2.11662e-12	-1.2369e-12
-7.75387e-13	-1.92131e-12	-1.2369e-12
-8.24207e-13	-1.77482e-12	-1.18807e-12
-9.21867e-13	-1.57951e-12	-1.2369e-12
-9.21867e-13	-1.3842e-12	-1.2369e-12
-9.70697e-13	-1.23772e-12	-1.2369e-12
-9.70697e-13	-1.0424e-12	-1.33456e-12
-1.01953e-12	-8.47089e-13	-1.33456e-12
-9.70697e-13	-7.00609e-13	-1.38339e-12
-9.21867e-13	-5.05289e-13	-1.38339e-12
-8.24207e-13	-3.09979e-13	-1.33456e-12
-7.26557e-13	-1.14669e-13	-1.2369e-12
-5.31237e-13	1.78301e-13	-1.13924e-12
-4.33587e-13	4.22441e-13	-1.09042e-12
-2.38277e-13	6.66581e-13	-1.09042e-12
-4.29573e-14	8.61891e-13	-1.09042e-12
1.52353e-13	1.0572e-12	-1.13924e-12
2.98833e-13	1.20369e-12	-1.2369e-12
4.45323e-13	1.30135e-12	-1.38339e-12
5.91803e-13	1.30135e-12	-1.5787e-12
6.89463e-13	1.30135e-12	-1.82284e-12
7.38293e-13	1.25252e-12	-2.01815e-12
7.87113e-13	1.15486e-12	-2.26229e-12
8.84773e-13	1.00838e-12	-2.55526e-12
9.33603e-13	9.10721e-13	-2.7994e-12
9.33603e-13	8.13061e-13	-2.99471e-12
9.33603e-13	6.66581e-13	-3.19002e-12
8.84773e-13	6.17751e-13	-3.28768e-12
8.35943e-13	5.68921e-13	-3.38534e-12
7.87113e-13	5.20101e-13	-3.43417e-12
7.38293e-13	5.20101e-13	-3.43417e-12
6.89463e-13	5.68921e-13	-3.33651e-12
6.89463e-13	6.66581e-13	-3.23885e-12
7.38293e-13	7.15411e-13	-3.19002e-12
7.38293e-13	7.64241e-13	-3.04354e-12
7.87113e-13	7.64241e-13	-2.94588e-12
8.84773e-13	7.15411e-13	-2.84823e-12
9.33603e-13	6.17751e-13	-2.75057e-12
9.82433e-13	5.68921e-13	-2.65292e-12
1.03125e-12	4.71271e-13	-2.60409e-12
9.82433e-13	3.73611e-13	-2.55526e-12
8.84773e-13	3.24781e-13	-2.50643e-12
8.35943e-13	2.27131e-13	-2.4576e-12
7.38293e-13	1.29471e-13	-2.4576e-12
5.91803e-13	3.18109e-14	-2.40878e-12
4.45323e-13	-1.14669e-13	-2.35995e-12
3.47663e-13	-2.61149e-13	-2.35995e-12
2.50003e-13	-4.07639e-13	-2.31112e-12
1.52353e-13	-5.54119e-13	-2.26229e-12
1.03523e-13	-6.51779e-13	-2.26229e-12
1.52353e-13	-7.98259e-13	-2.21346e-12
2.01183e-13	-8.95919e-13	-2.26229e-12
2.50003e-13	-9.44749e-13	-2.21346e-12
2.98833e-13	-9.93579e-13	-2.21346e-12
3.47663e-13	-9.93579e-13	-2.21346e-12
4.45323e-13	-9.93579e-13	-2.21346e-12
4.45323e-13	-9.93579e-13	-2.26229e-12
4.94153e-13	-8.95919e-13	-2.26229e-12
5.42973e-13	-7.98259e-13	-2.35995e-12
4.94153e-13	-7.49439e-13	-2.40878e-12
4.94153e-13	-6.02949e-13	-2.50643e-12
3.96493e-13	-4.56469e-13	-2.60409e-12
2.98833e-13	-3.09979e-13	-2.75057e-12
2.50003e-13	-1.14669e-13	-2.84823e-12
1.03523e-13	8.06409e-14	-2.99471e-12
-9.17873e-14	2.27131e-13	-3.1412e-12
-2.38277e-13	4.22441e-13	-3.28768e-12
-3.35927e-13	5.20101e-13	-3.43417e-12
-4.82417e-13	6.66581e-13	-3.53182e-12
-5.80067e-13	6.66581e-13	-3.58065e-12
-6.28897e-13	7.15411e-13	-3.62948e-12
-6.28897e-13	7.15411e-13	-3.58065e-12
-6.28897e-13	6.66581e-13	-3.48299e-12
-5.31237e-13	5.68921e-13	-3.33651e-12
-4.33587e-13	4.71271e-13	-3.1412e-12
-3.84757e-13	3.24781e-13	-2.94588e-12
-2.87097e-13	1.78301e-13	-2.75057e-12
-1.89447e-13	3.18109e-14	-2.4576e-12
-9.17873e-14	-2.12329e-13	-2.21346e-12
-4.29573e-14	-4.07639e-13	-1.96932e-12
-4.29573e-14	-6.02949e-13	-1.72518e-12
5.86271e-15	-7.98259e-13	-1.5787e-12
5.46927e-14	-9.44749e-13	-1.43222e-12
5.86271e-15	-1.09123e-12	-1.33456e-12
-4.29573e-14	-1.14006e-12	-1.2369e-12
-9.17873e-14	-1.09123e-12	-1.18807e-12
-9.17873e-14	-9.93579e-13	-1.2369e-12
-9.17873e-14	-8.95919e-13	-1.2369e-12
-1.40617e-13	-6.51779e-13	-1.33456e-12
-9.17873e-14	-4.56469e-13	-1.43222e-12
-4.29573e-14	-2.61149e-13	-1.52987e-12
5.86271e-15	-1.14669e-13	-1.62753e-12
1.03523e-13	-6.58391e-14	-1.72518e-12
1.52353e-13	-6.58391e-14	-1.77401e-12
2.01183e-13	-1.14669e-13	-1.82284e-12
3.47663e-13	-3.09979e-13	-1.82284e-12
3.96493e-13	-5.05289e-13	-1.82284e-12
3.96493e-13	-6.51779e-13	-1.72518e-12
4.45323e-13	-7.49439e-13	-1.62753e-12
4.94153e-13	-8.47089e-13	-1.48104e-12
4.94153e-13	-8.95919e-13	-1.33456e-12
4.45323e-13	-9.44749e-13	-1.2369e-12
2.98833e-13	-9.44749e-13	-1.09042e-12
1.52353e-13	-9.44749e-13	-9.92757e-13
5.46927e-14	-8.95919e-13	-9.43927e-13
-9.17873e-14	-7.98259e-13	-8.46277e-13
-1.40617e-13	-7.00609e-13	-7.48617e-13
-1.89447e-13	-5.54119e-13	-6.02137e-13
-1.89447e-13	-4.07639e-13	-5.53307e-13
-1.40617e-13	-2.12329e-13	-5.04477e-13
-4.29573e-14	-6.58391e-14	-4.55647e-13
1.03523e-13	8.06409e-14	-5.04477e-13
2.01183e-13	2.27131e-13	-5.04477e-13
3.47663e-13	3.24781e-13	-6.02137e-13
4.45323e-13	3.73611e-13	-6.50967e-13
5.42973e-13	4.22441e-13	-7.48617e-13
5.91803e-13	4.71271e-13	-7.97447e-13
6.40633e-13	5.20101e-13	-7.97447e-13
5.91803e-13	5.20101e-13	-7.48617e-13
5.42973e-13	5.20101e-13	-6.50967e-13
4.45323e-13	5.68921e-13	-4.55647e-13
2.98833e-13	5.68921e-13	-2.11507e-13
1.52353e-13	6.66581e-13	3.26334e-14
5.86271e-15	7.15411e-13	3.25603e-13
-9.17873e-14	8.61891e-13	6.18563e-13
-1.89447e-13	9.59551e-13	8.62713e-13
-2.38277e-13	1.0572e-12	1.10685e-12
-2.87097e-13	1.10603e-12	1.25333e-12
-2.87097e-13	1.15486e-12	1.30216e-12
-2.87097e-13	1.15486e-12	1.35099e-12
-2.87097e-13	1.0572e-12	1.25333e-12
-2.87097e-13	9.10721e-13	1.15567e-12
-3.35927e-13	7.64241e-13	9.60363e-13
-2.87097e-13	5.20101e-13	7.65053e-13
-3.84757e-13	2.27131e-13	5.20913e-13
-3.84757e-13	-1.14669e-13	2.27943e-13
-4.82417e-13	-4.56469e-13	-1.61966e-14
-5.80067e-13	-7.98259e-13	-3.09167e-13
-7.26557e-13	-1.14006e-12	-5.53307e-13
-8.24207e-13	-1.48186e-12	-8.46277e-13
-9.70697e-13	-1.67717e-12	-1.09042e-12
-1.01953e-12	-1.82365e-12	-1.28573e-12
-1.11718e-12	-1.87248e-12	-1.48104e-12
-1.16601e-12	-1.82365e-12	-1.52987e-12
-1.21484e-12	-1.67717e-12	-1.5787e-12
-1.21484e-12	-1.57951e-12	-1.5787e-12
-1.16601e-12	-1.43303e-12	-1.48104e-12
-1.11718e-12	-1.33537e-12	-1.28573e-12
-1.01953e-12	-1.18889e-12	-1.13924e-12
-9.70697e-13	-1.14006e-12	-8.46277e-13
-9.21867e-13	-9.93579e-13	-5.53307e-13
-8.24207e-13	-8.47089e-13	-3.09167e-13
-7.75387e-13	-7.49439e-13	3.26334e-14
-6.77727e-13	-5.54119e-13	2.76773e-13
-6.77727e-13	-3.58809e-13	5.69743e-13
-6.77727e-13	-2.12329e-13	8.13883e-13
-7.26557e-13	-1.14669e-13	1.05802e-12
-7.26557e-13	-6.58391e-14	1.25333e-12
-7.26557e-13	-1.14669e-13	1.44864e-12
-7.75387e-13	-1.63499e-13	1.59513e-12
-7.75387e-13	-3.09979e-13	1.69278e-12
-7.75387e-13	-5.05289e-13	1.83927e-12
[truncated: 1,046,576+ more rows]
