# Supplementary material for: Unmasking coupling between channel gating and ion permeation in the muscle nicotinic receptor
Source: eLife. 2021 Apr 6;10:e66225. doi: 10.7554/eLife.66225 (PMC8024024; doi:10.7554/eLife.66225)
Supplement: Figure 6—source data 2. [file elife-66225-fig6-data2.xlsx]

## Sheet: Sheet1
Figure 6c, Open Channel Current Standard Deviation Relative to Amplitude
WT	0.040196	0.0354115	0.0381317	0.0379843	0.038273	0.0381164	0.0463748	0.0493503	0.0464884	0.0414096	0.0420335	0.042486	0.0339288	0.0397749	0.044621	0.0375568	0.0440565	0.037983	0.0392598	0.0392505	0.0530951	0.0457688	0.0386548	0.0456992	0.0409078	0.0390368	0.0416745	0.0403684	0.0406862	0.040875	0.0434279	0.0391042	0.0356737	0.0415876	0.042594	0.040566	0.041067	0.0371917	0.0381524	0.0393626	0.0471717	0.0424849	0.0410829	0.0461226	0.0398871	0.0457199	0.0348002	0.0400633	0.0414185
Beta DN	0.110701	0.0883614	0.0858516	0.0922431	0.106065	0.109561	0.107834	0.131773	0.10344	0.0883954	0.118655	0.0889603	0.105673	0.11011	0.087864	0.0910214	0.0880373	0.0871978	0.116105	0.0929157	0.0820909	0.0932659	0.0973672	0.0979293	0.0960513	0.124503	0.0830035	0.0888585	0.084169	0.0869733	0.1078	0.0922208	0.0889239	0.125464	0.0943064	0.0858819	0.10015	0.101292	0.118361	0.0915726	0.0914733	0.101678	0.0961365	0.0883276	0.0874378	0.0753216	0.0918744	0.0966374	0.0971511
Beta DN + Delta DN	0.154025	0.142432	0.180683	0.163894	0.187602	0.144542	0.165484	0.144185	0.153082	0.158288	0.173806	0.149682	0.144019	0.140467	0.158913	0.166644	0.174032	0.146727	0.155451	0.161825	0.158089	0.157168	0.145359	0.170478	0.153598	0.140246	0.189373	0.157237	0.155997	0.124023	0.180542	0.145299	0.173927	0.15091	0.14866	0.162061	0.142593	0.161134	0.168979	0.167967	0.185254	0.16775	0.190245	0.150463	0.152461	0.155307	0.14687	0.14775	0.161668
[truncated: 54 more columns]
